# Supplementary material for: Cyclohexyl Ketone Inhibitors of Pin1 Dock in a Trans-Diaxial Cyclohexane Conformation
Source: PubMed Central journal article supplement (PMC3446931; doi:10.1371/journal.pone.0044226), 2012-09-19

# Cyclohexyl ketone inhibitors of Pin1 dock in a *trans*-diaxial cyclohexane conformation

Guoyan G. Xu, Carla Slebodnick, and Felicia A. Etzkorn\*

Department of Chemistry, Virginia Tech, Blacksburg, VA 24061-0212, USA

Dataset S1. NMR Spectra and chromatograms for compounds **1**, *rac*-**2**, and **7** – **13**.

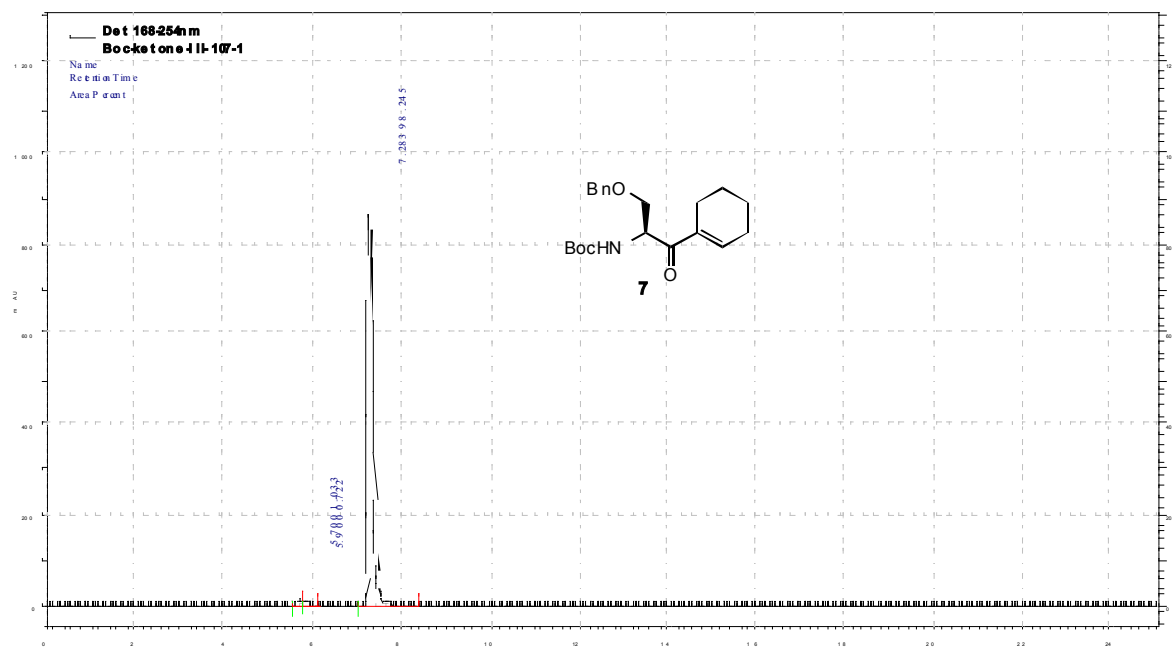

\* Corresponding author. Phone: +1 540 231 2235; fax: +1 540 231 3255; e-mail: [fetzkorn@vt.edu](mailto:fetzkorn@vt.edu)

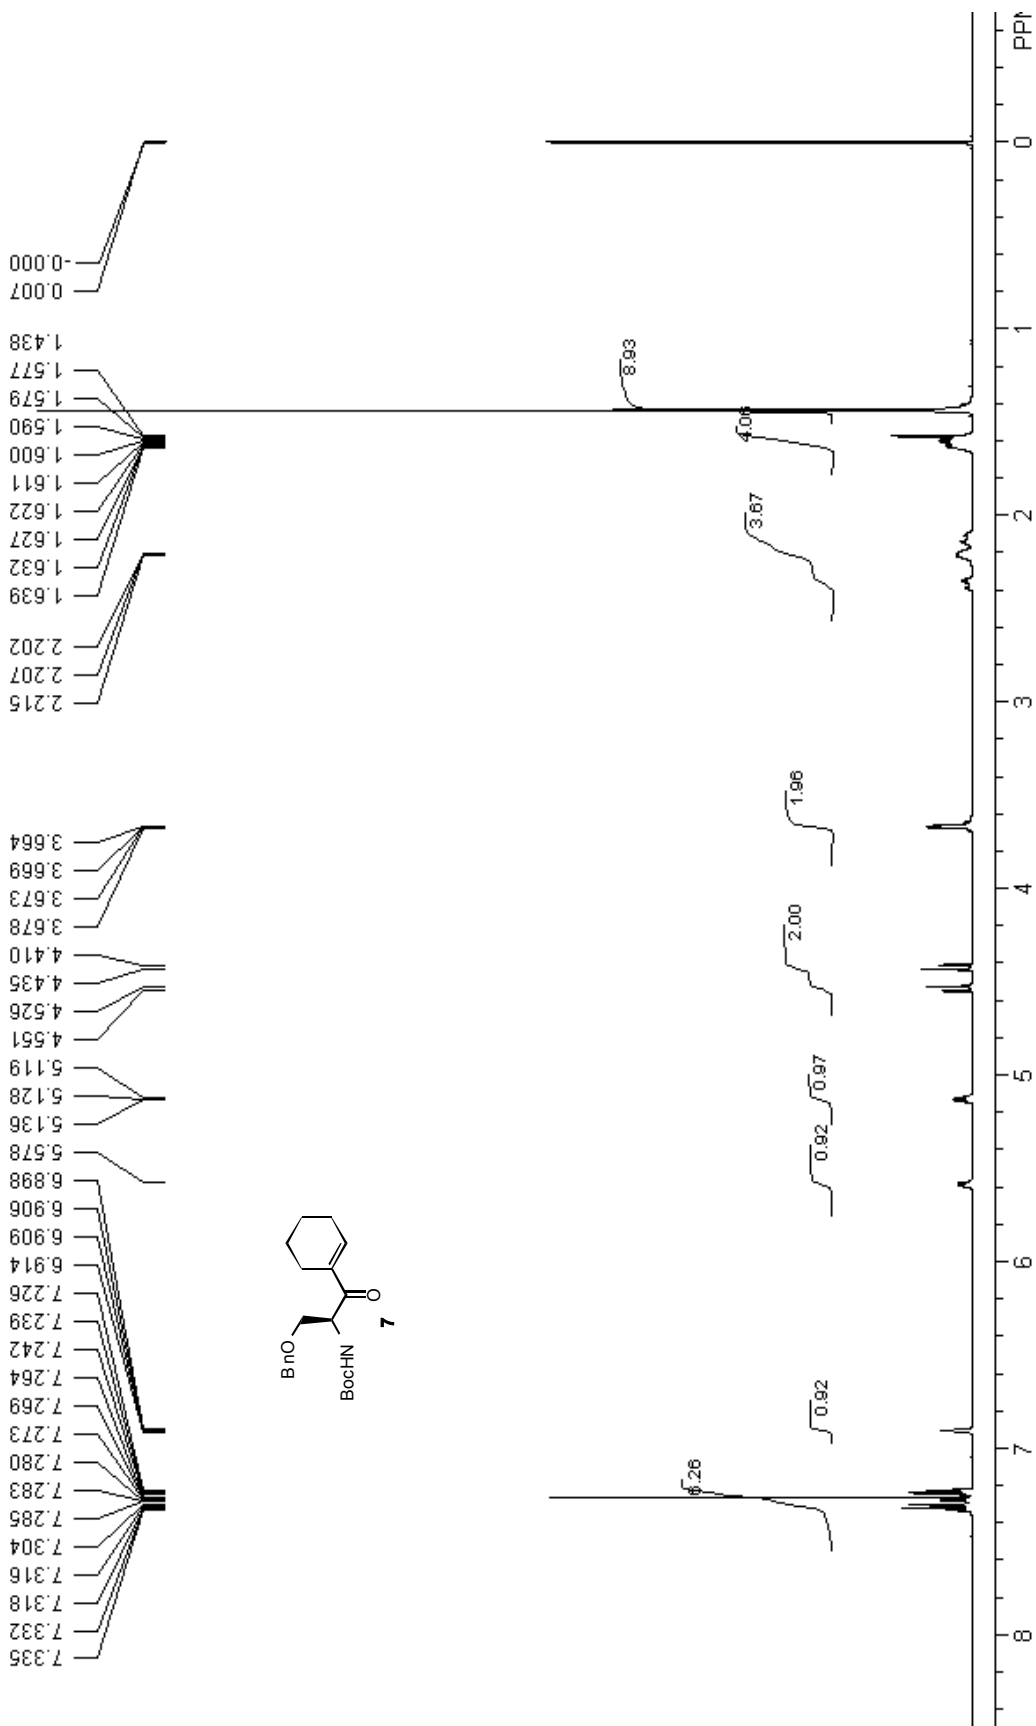

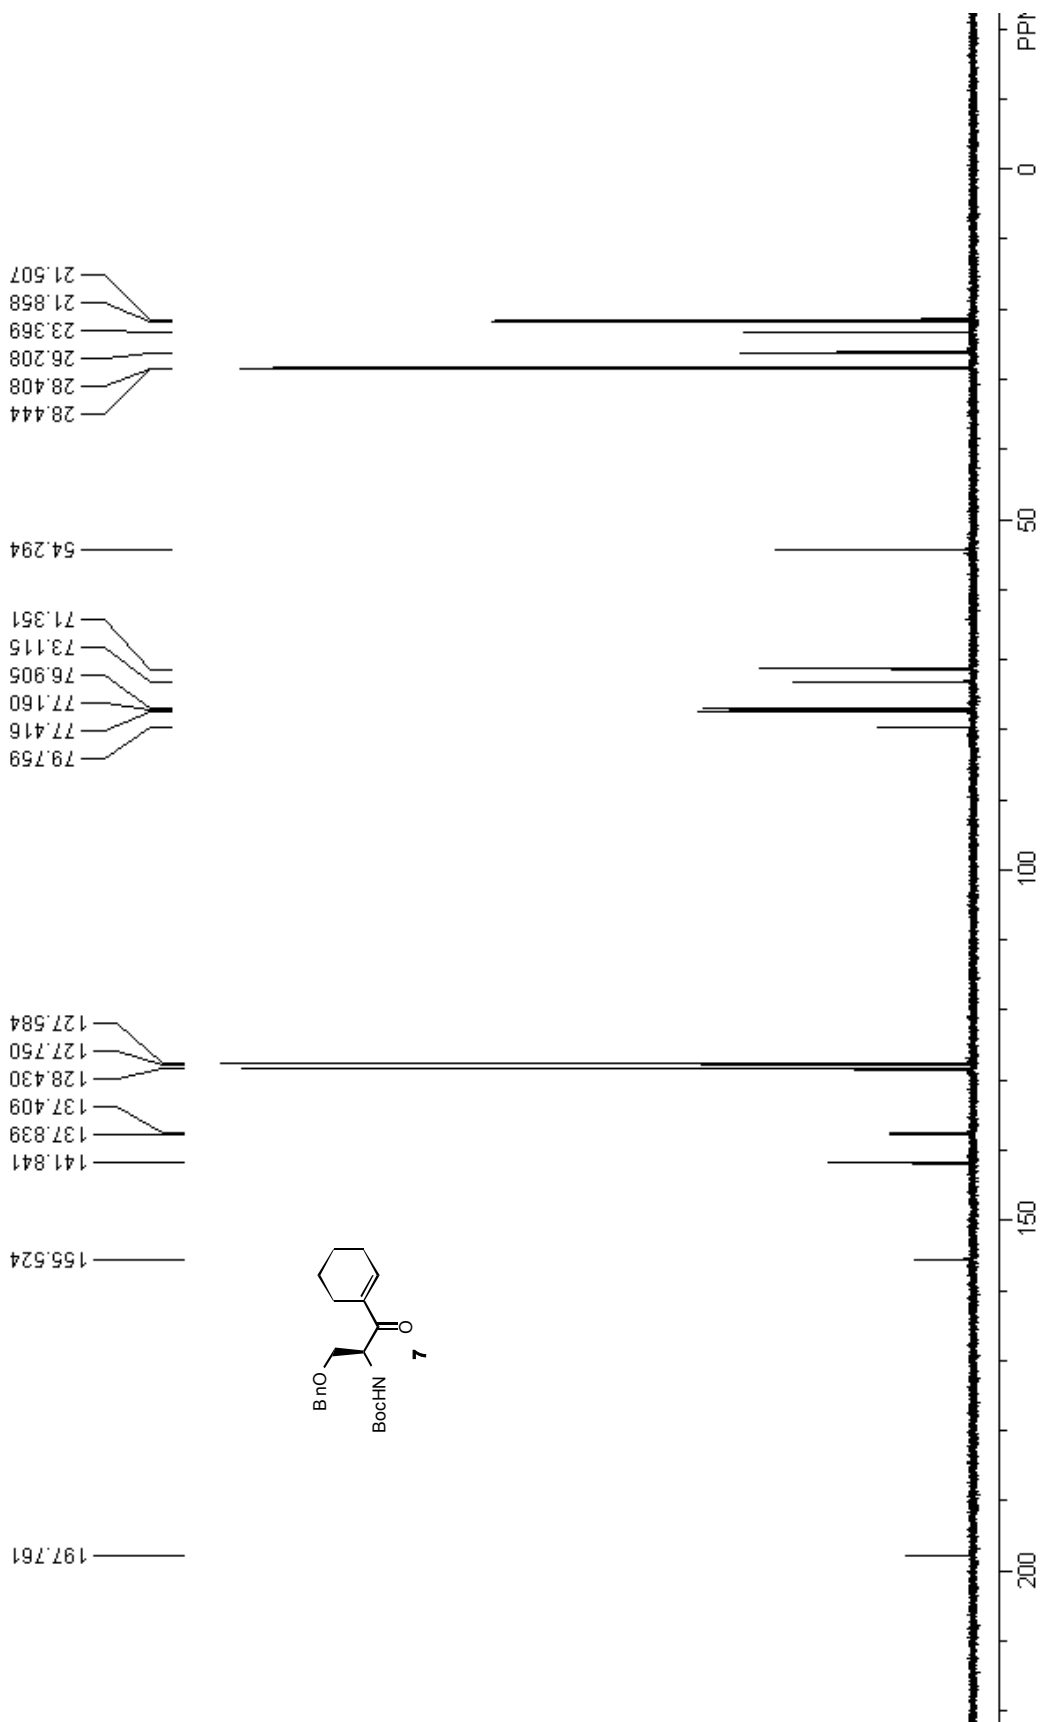

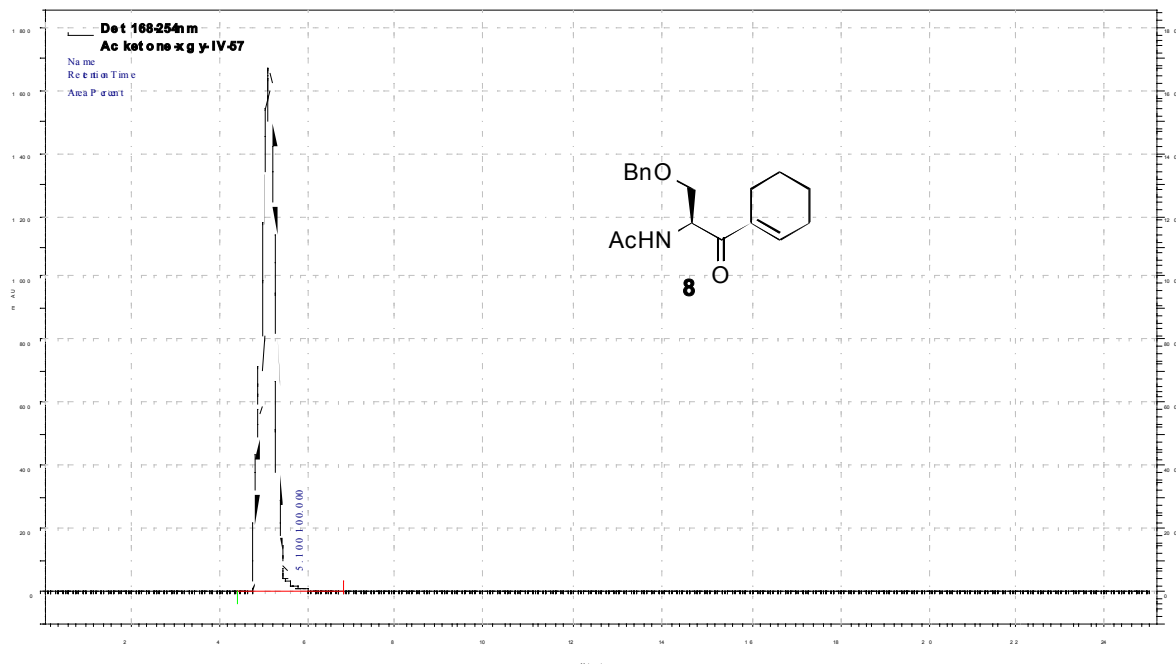

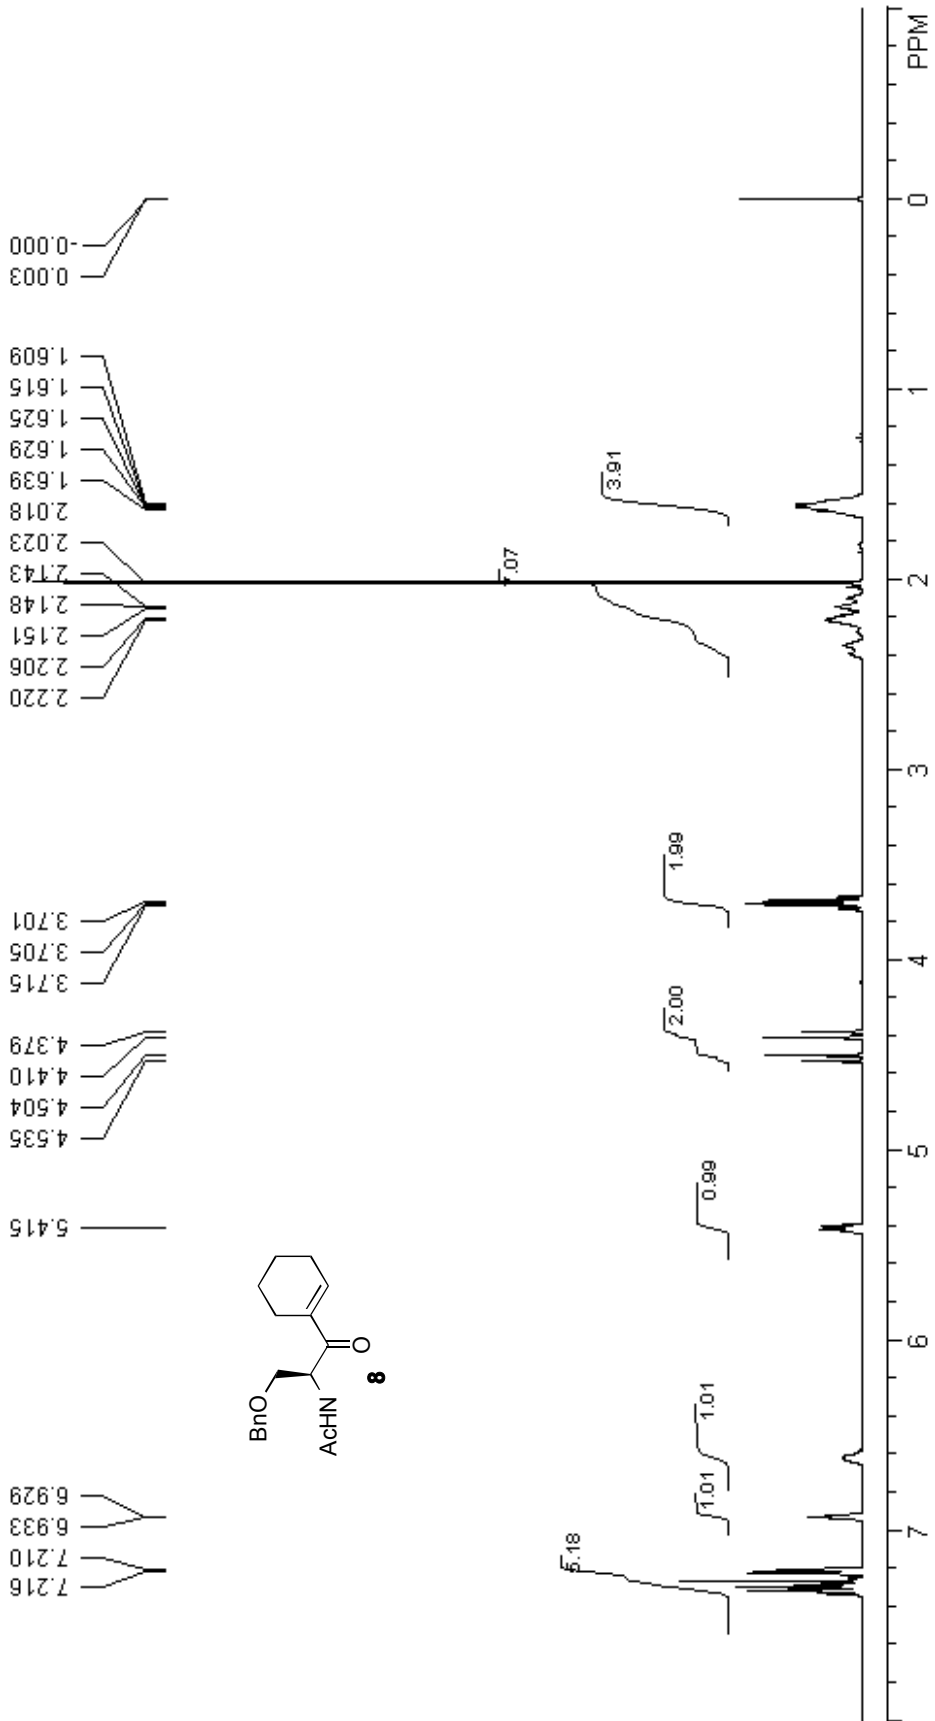

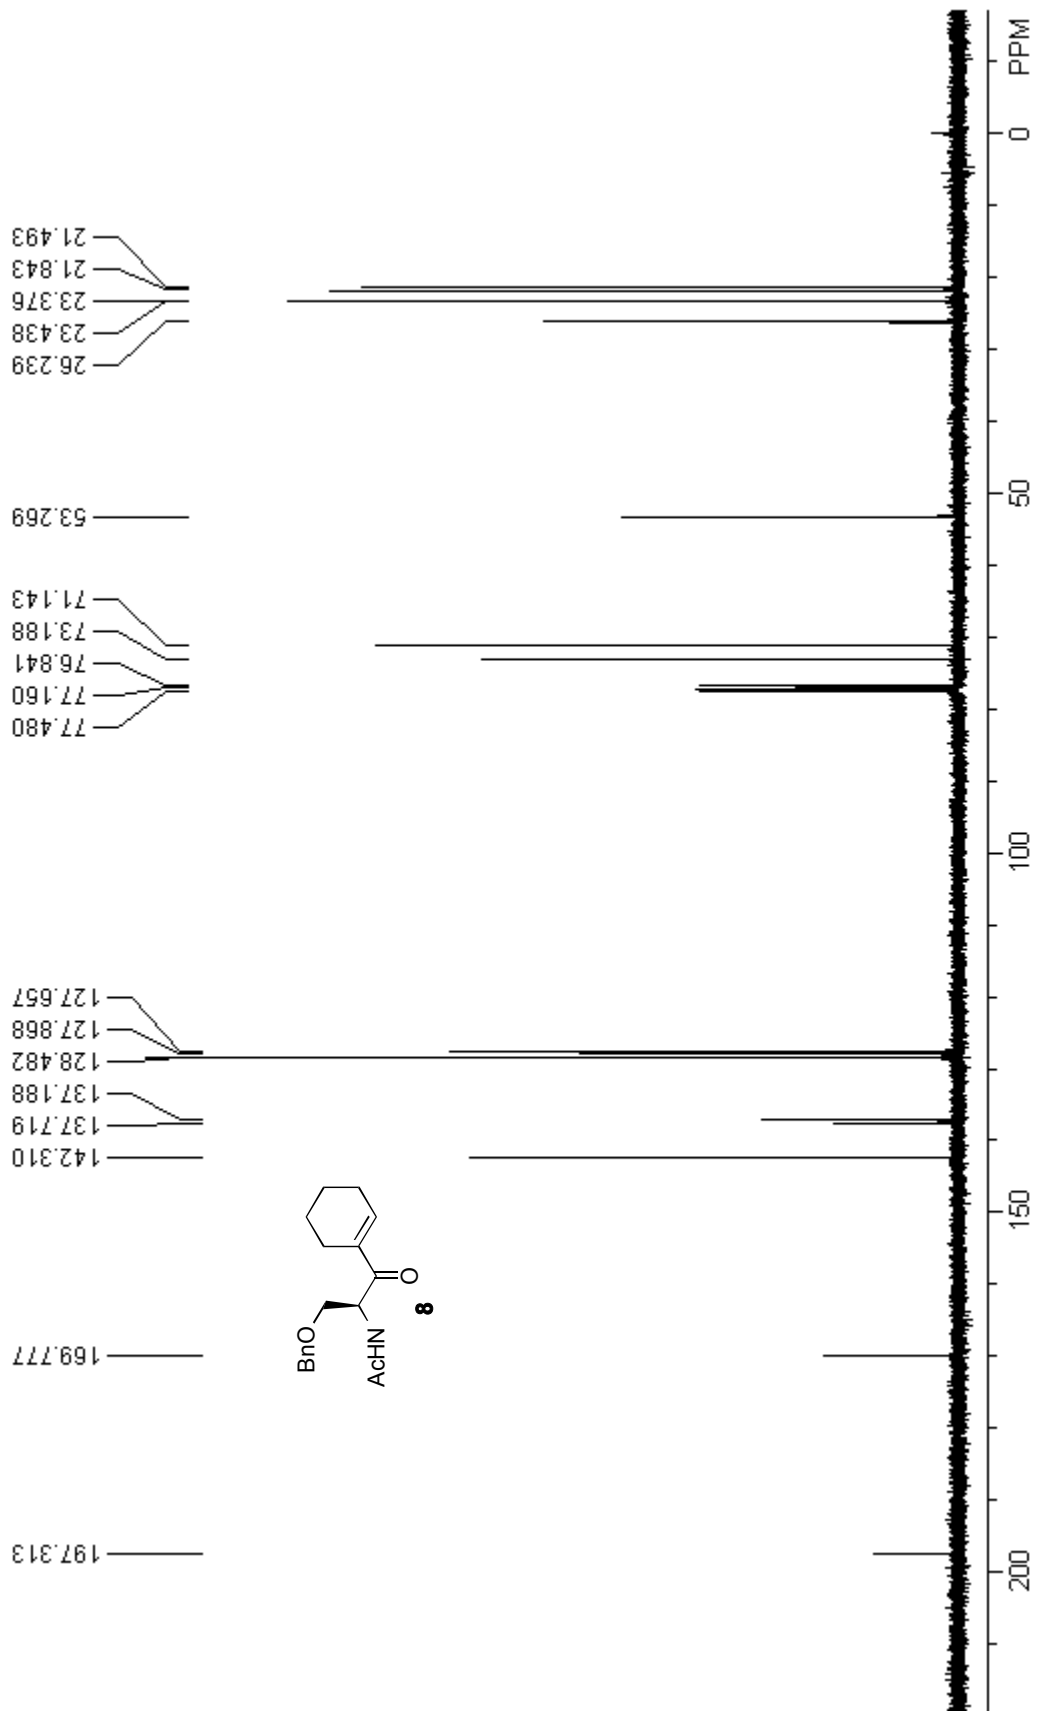

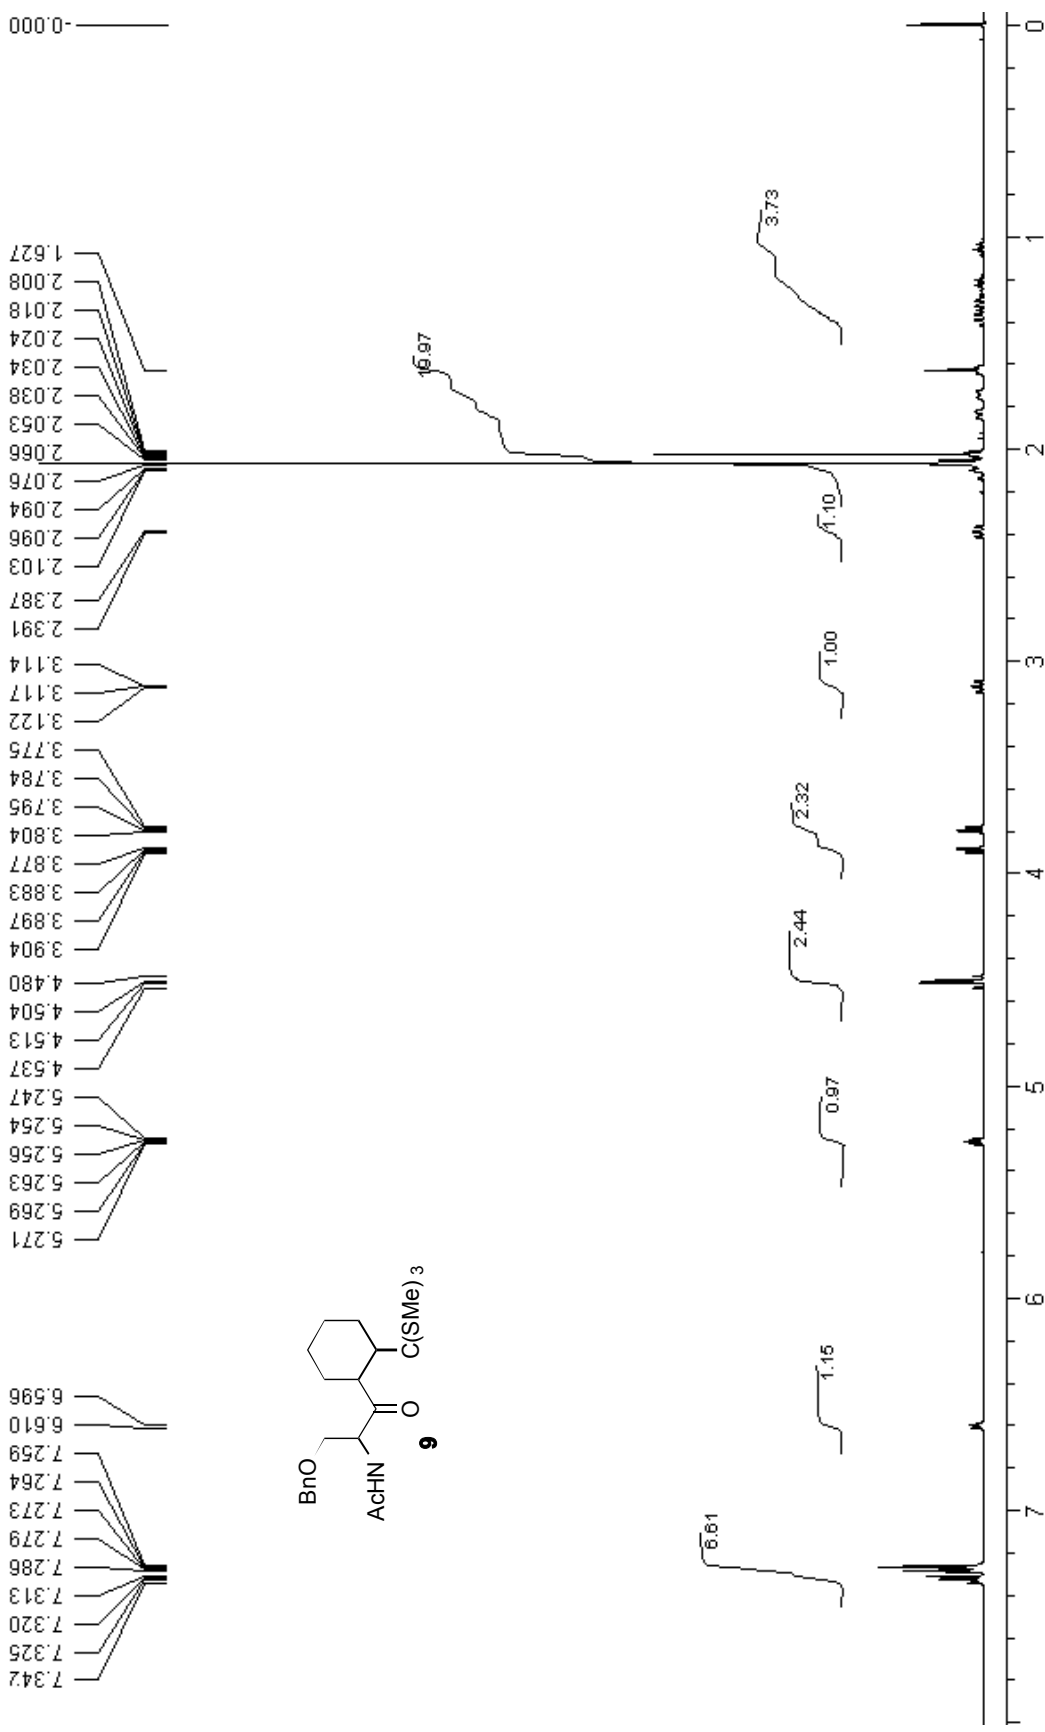

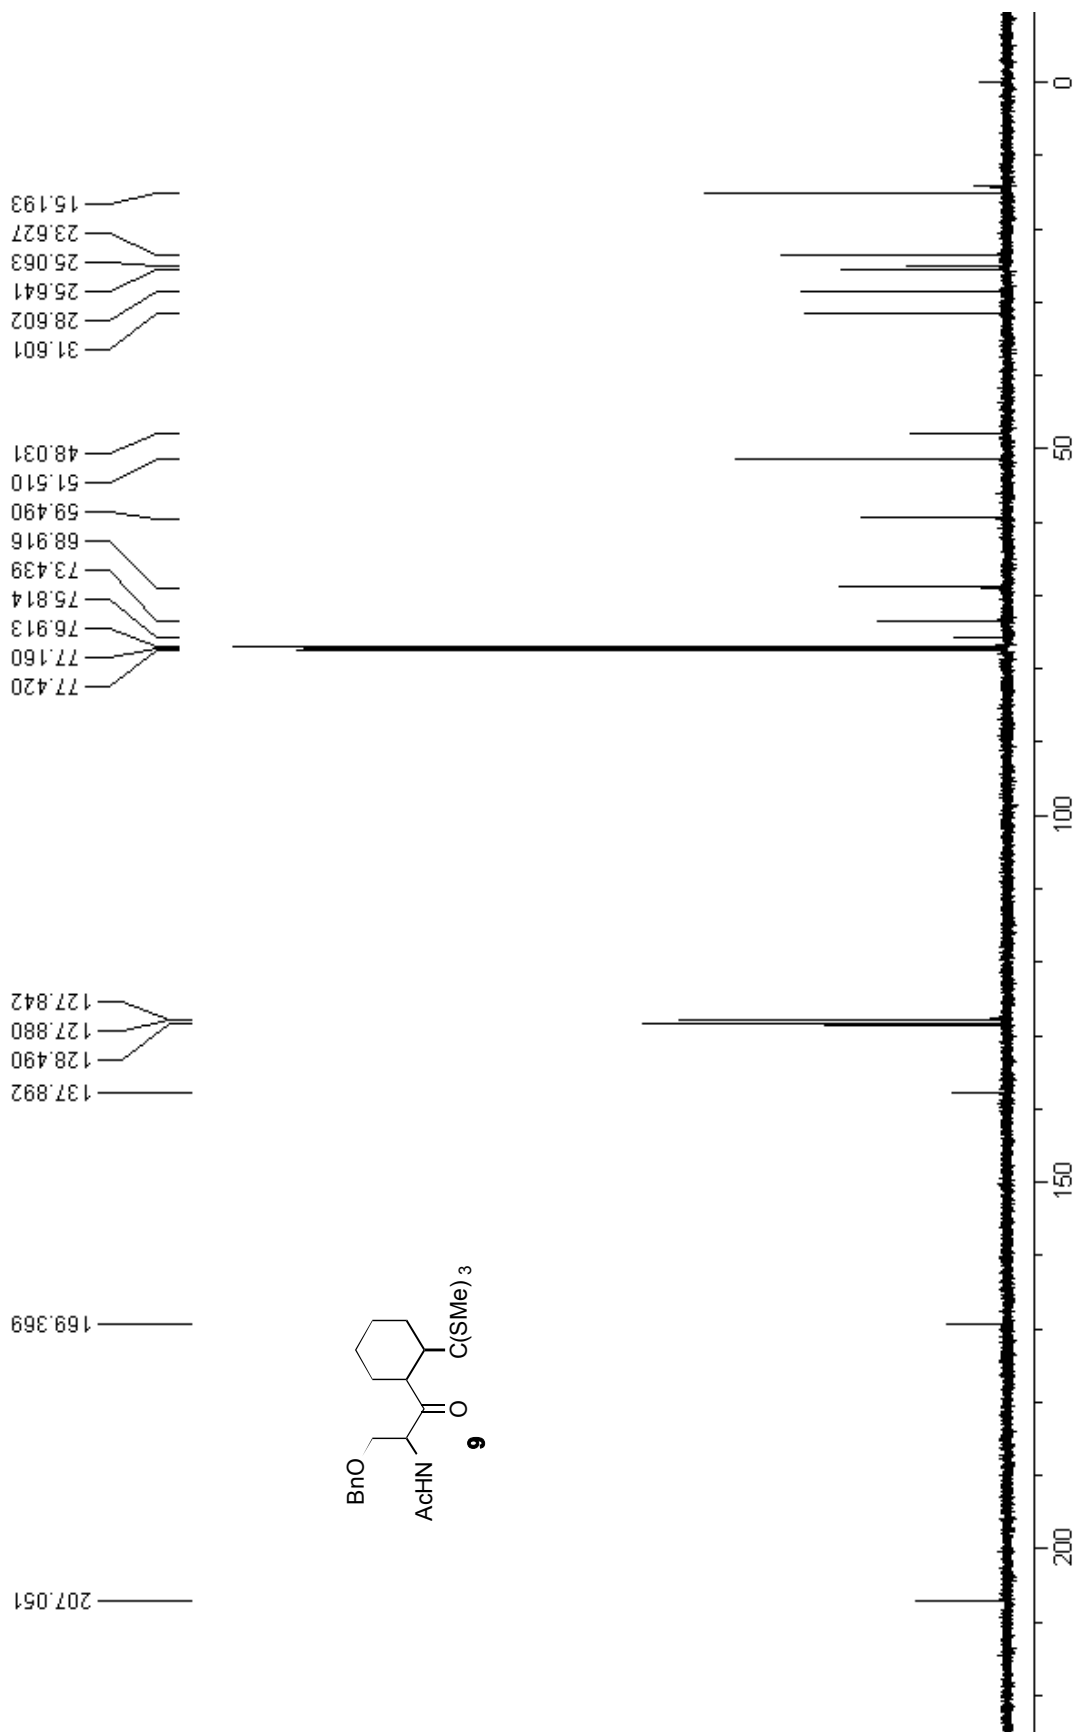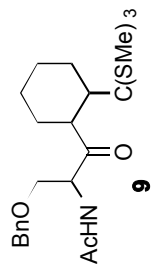



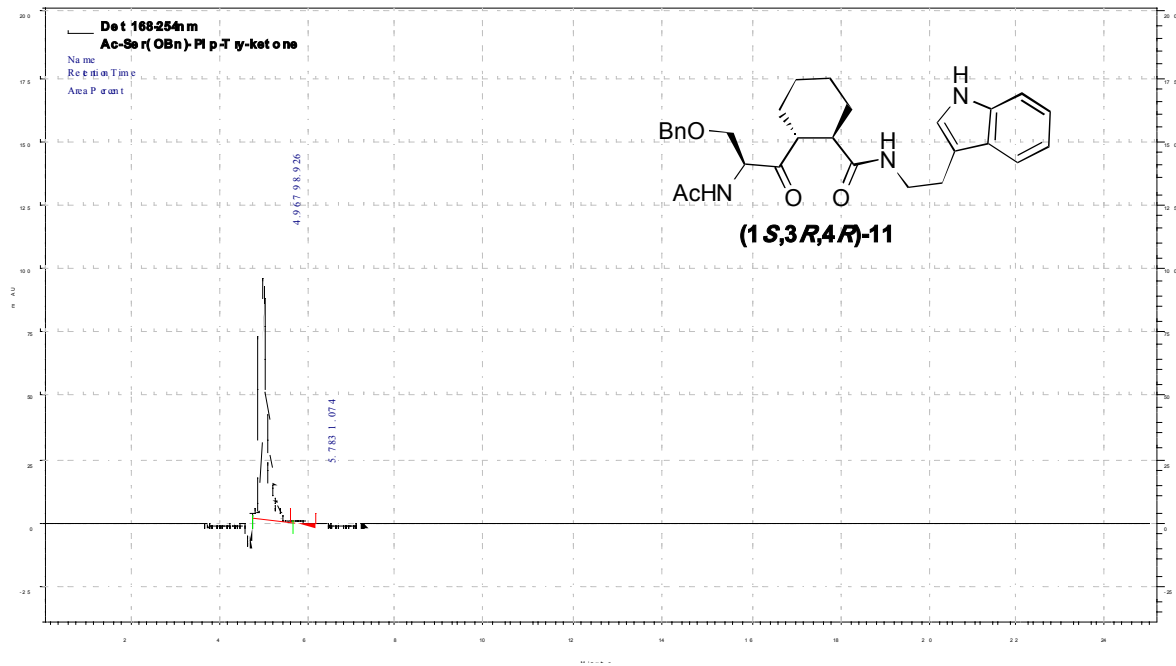

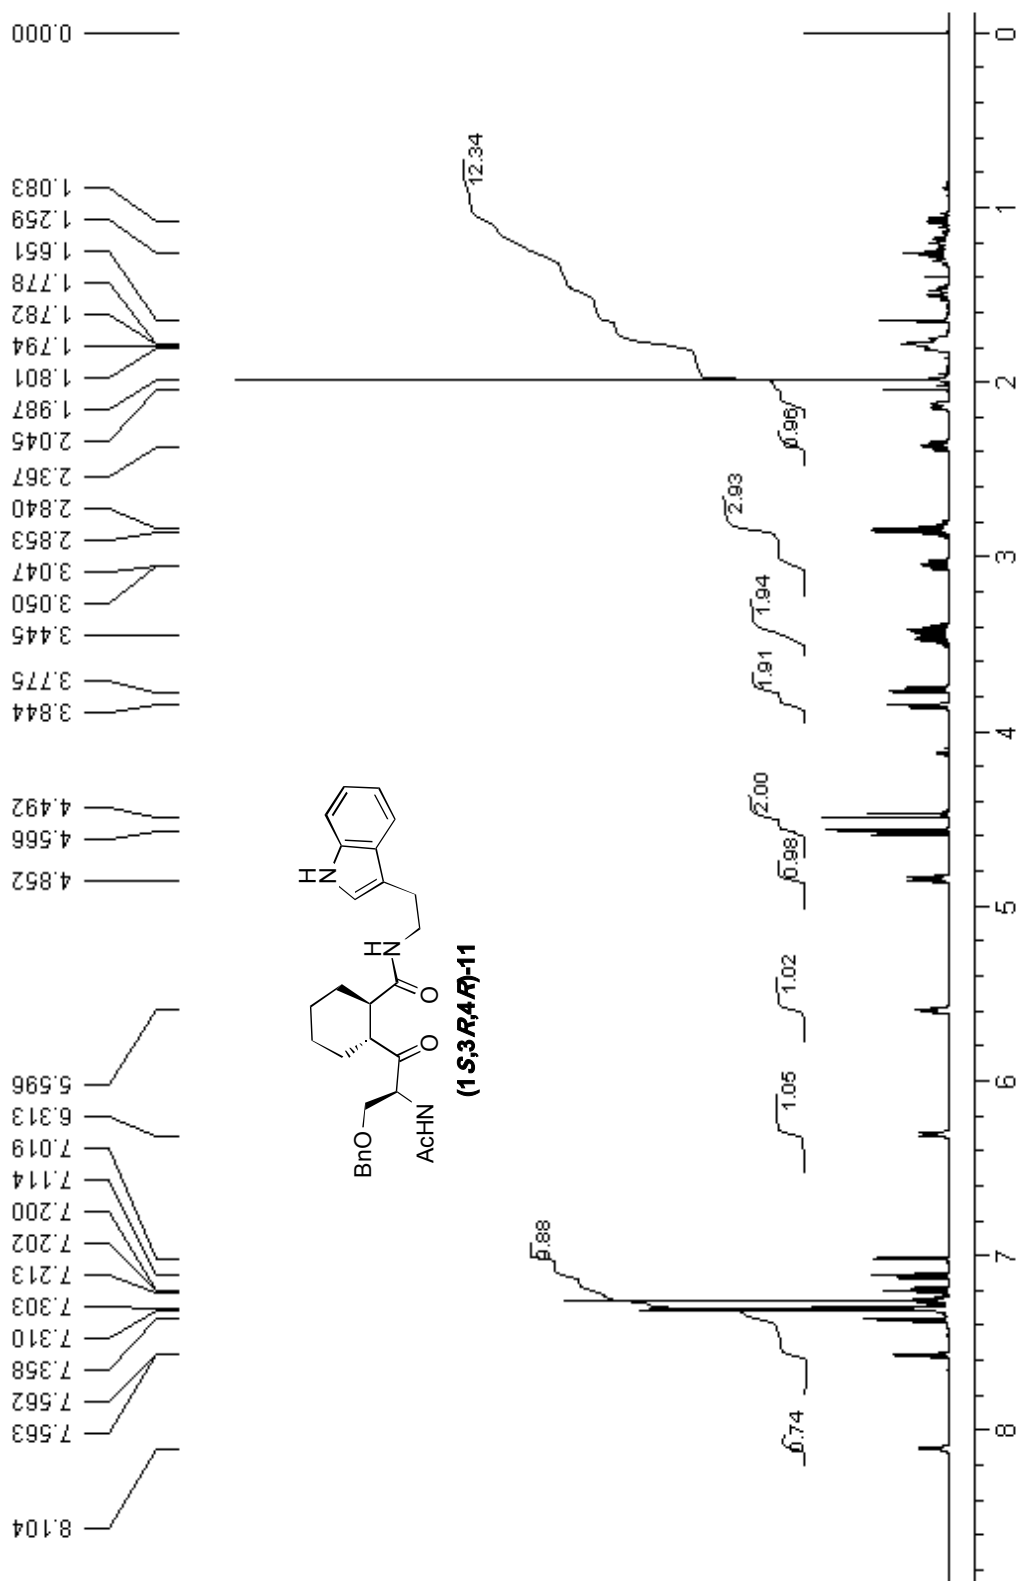

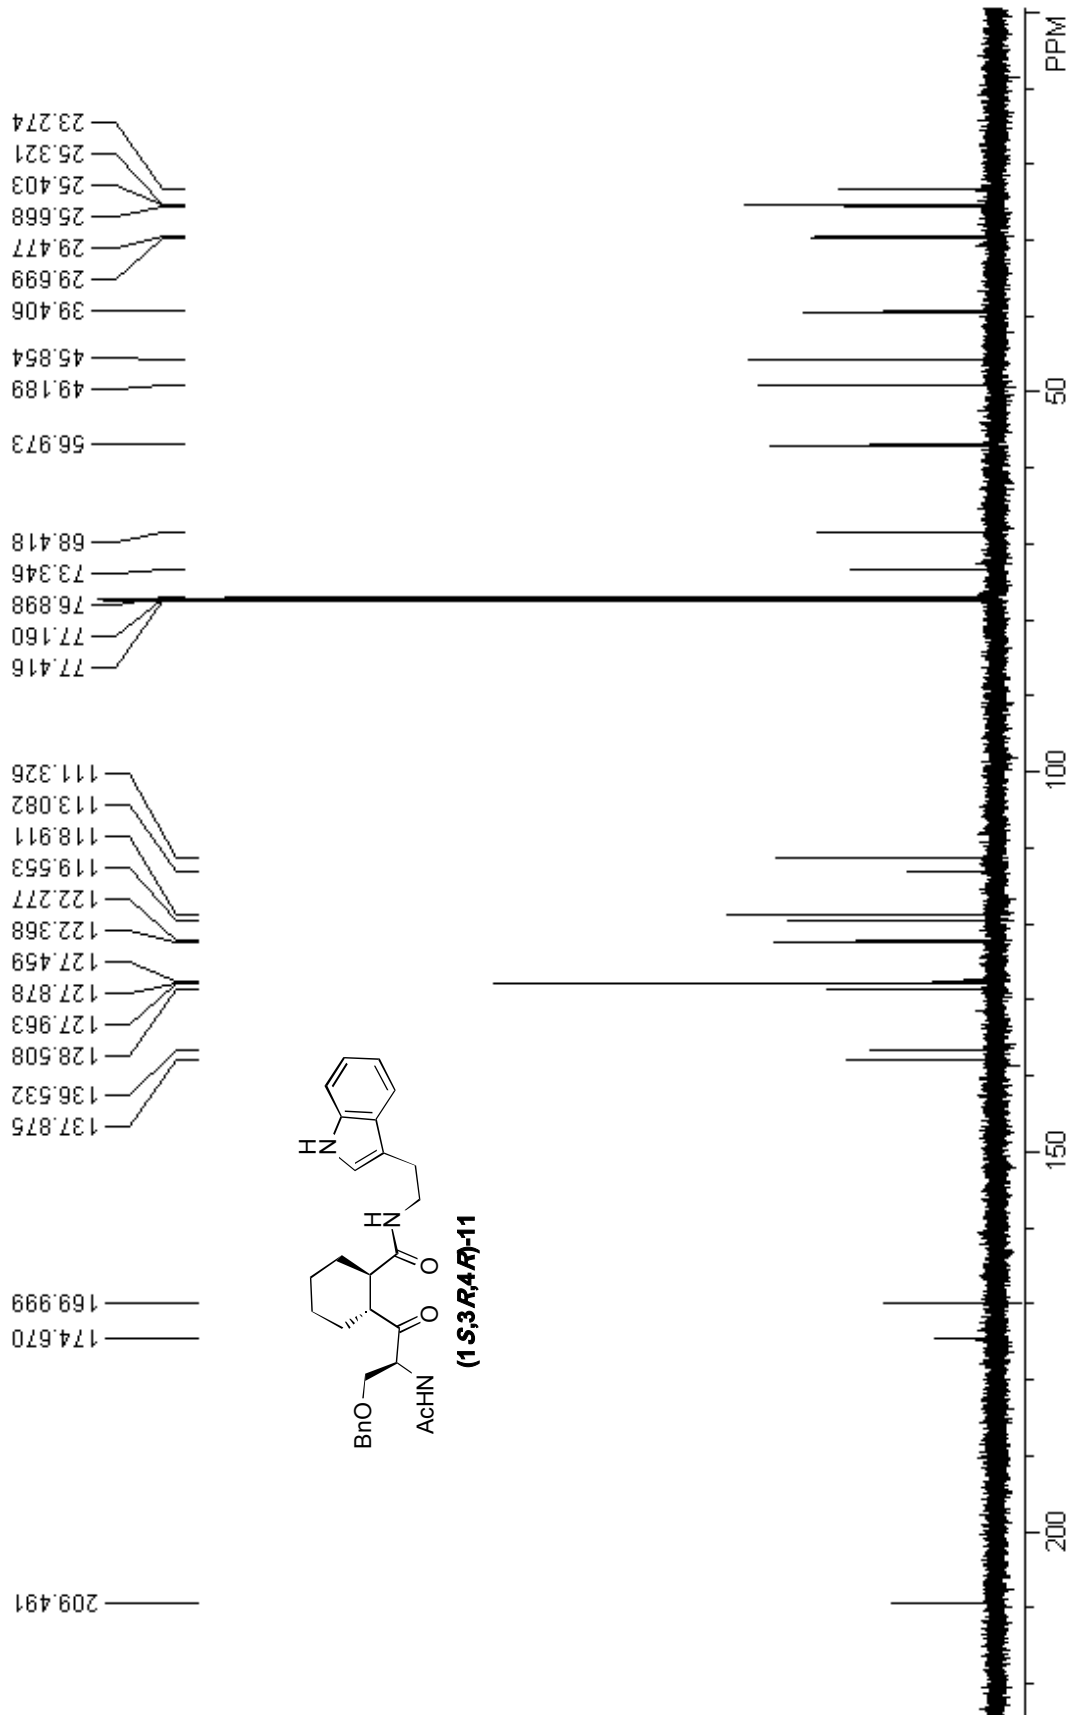

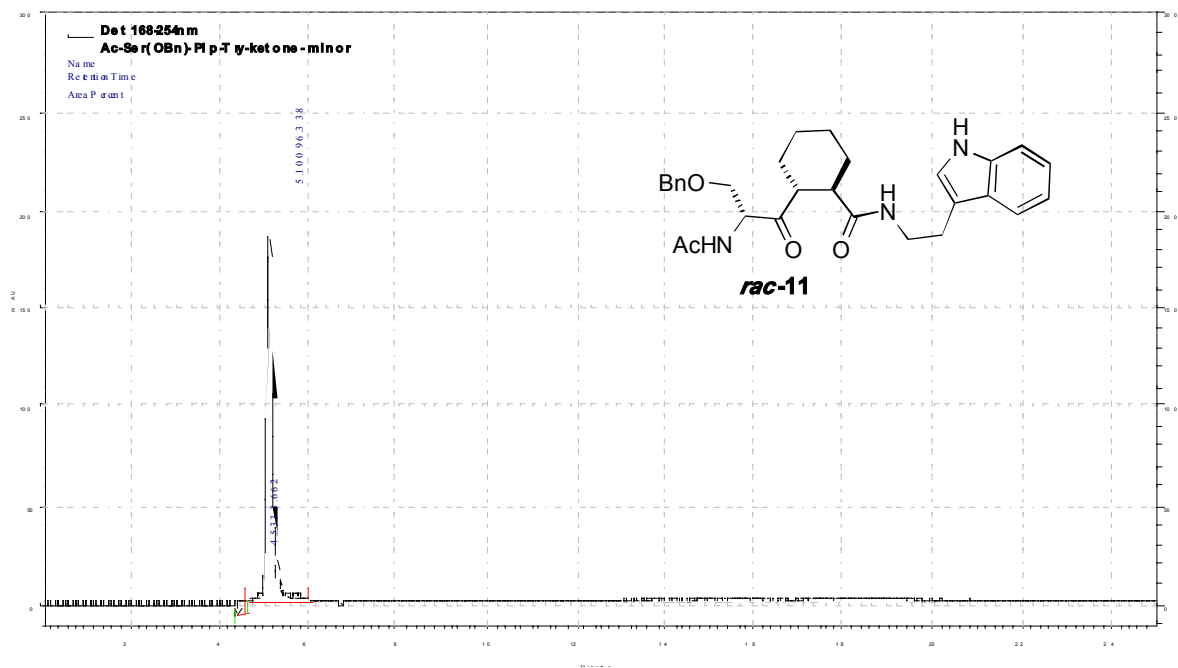

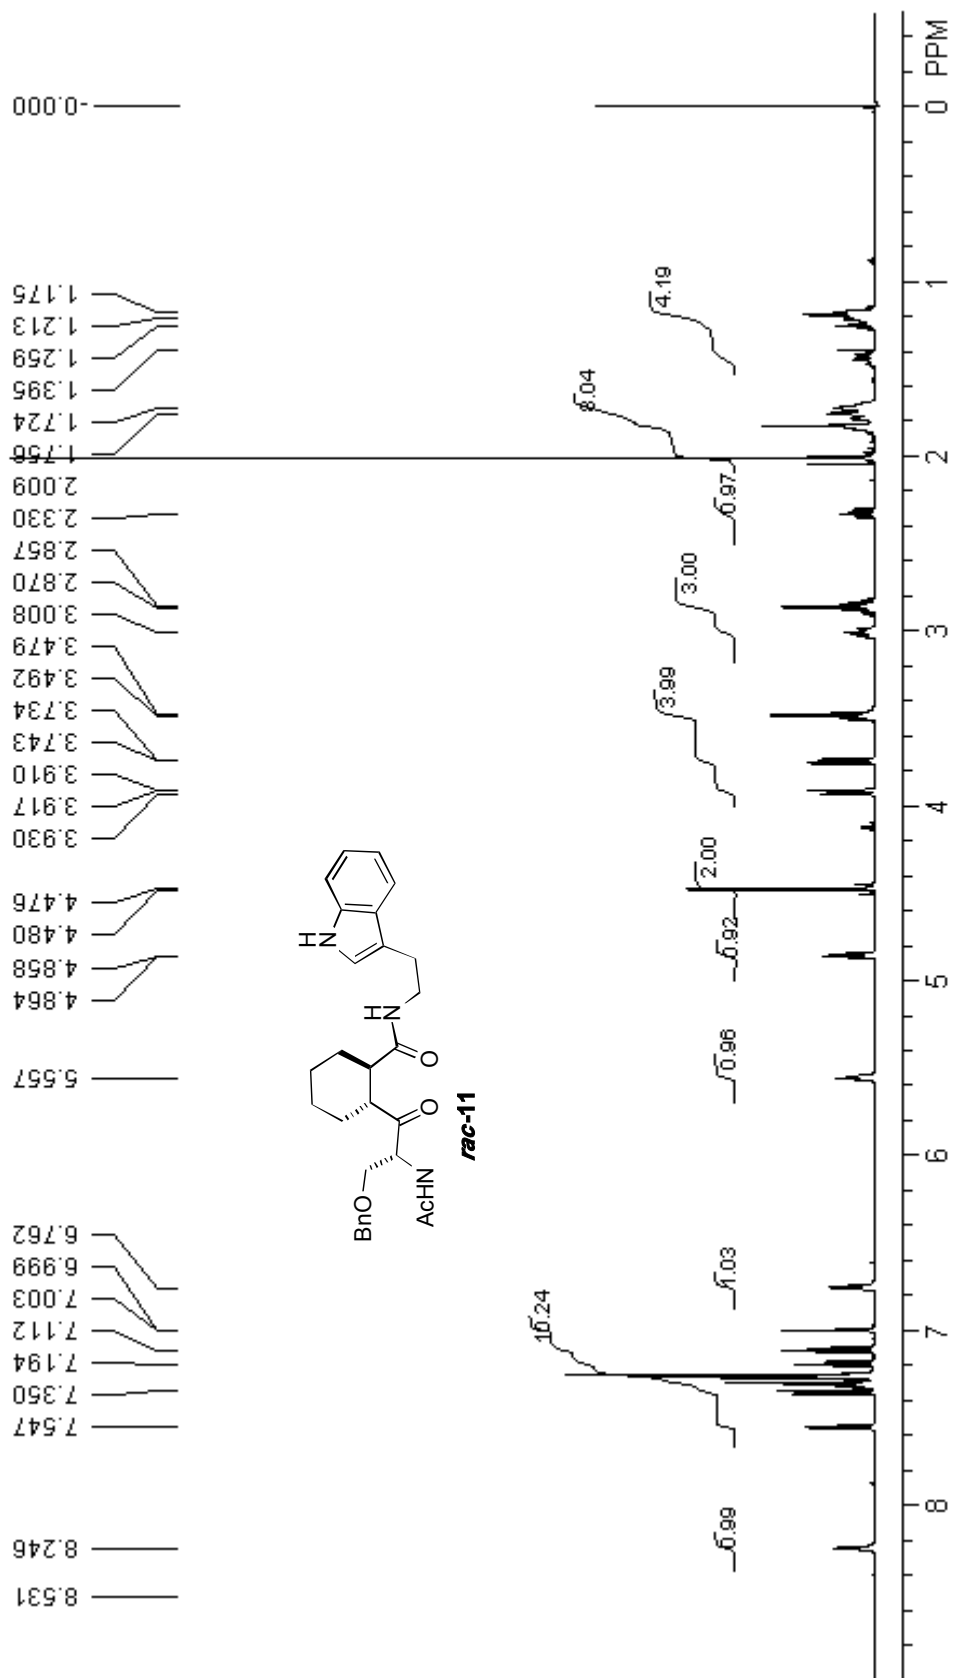

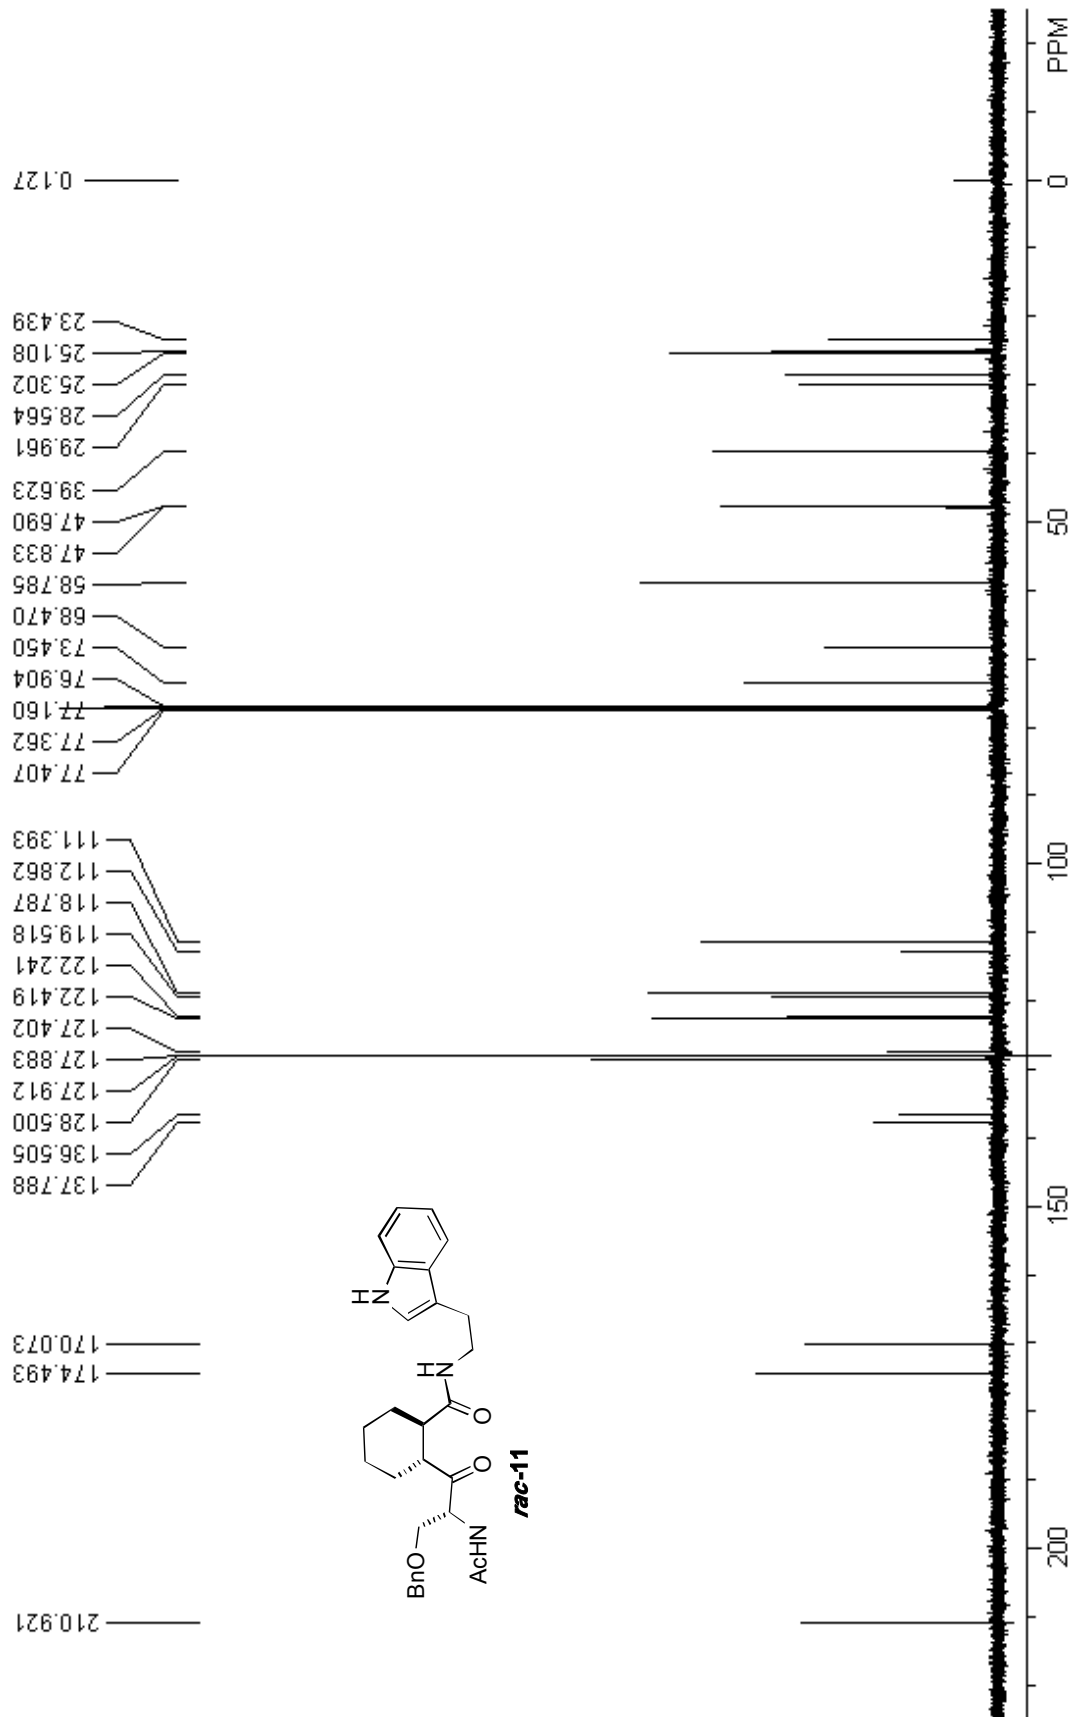

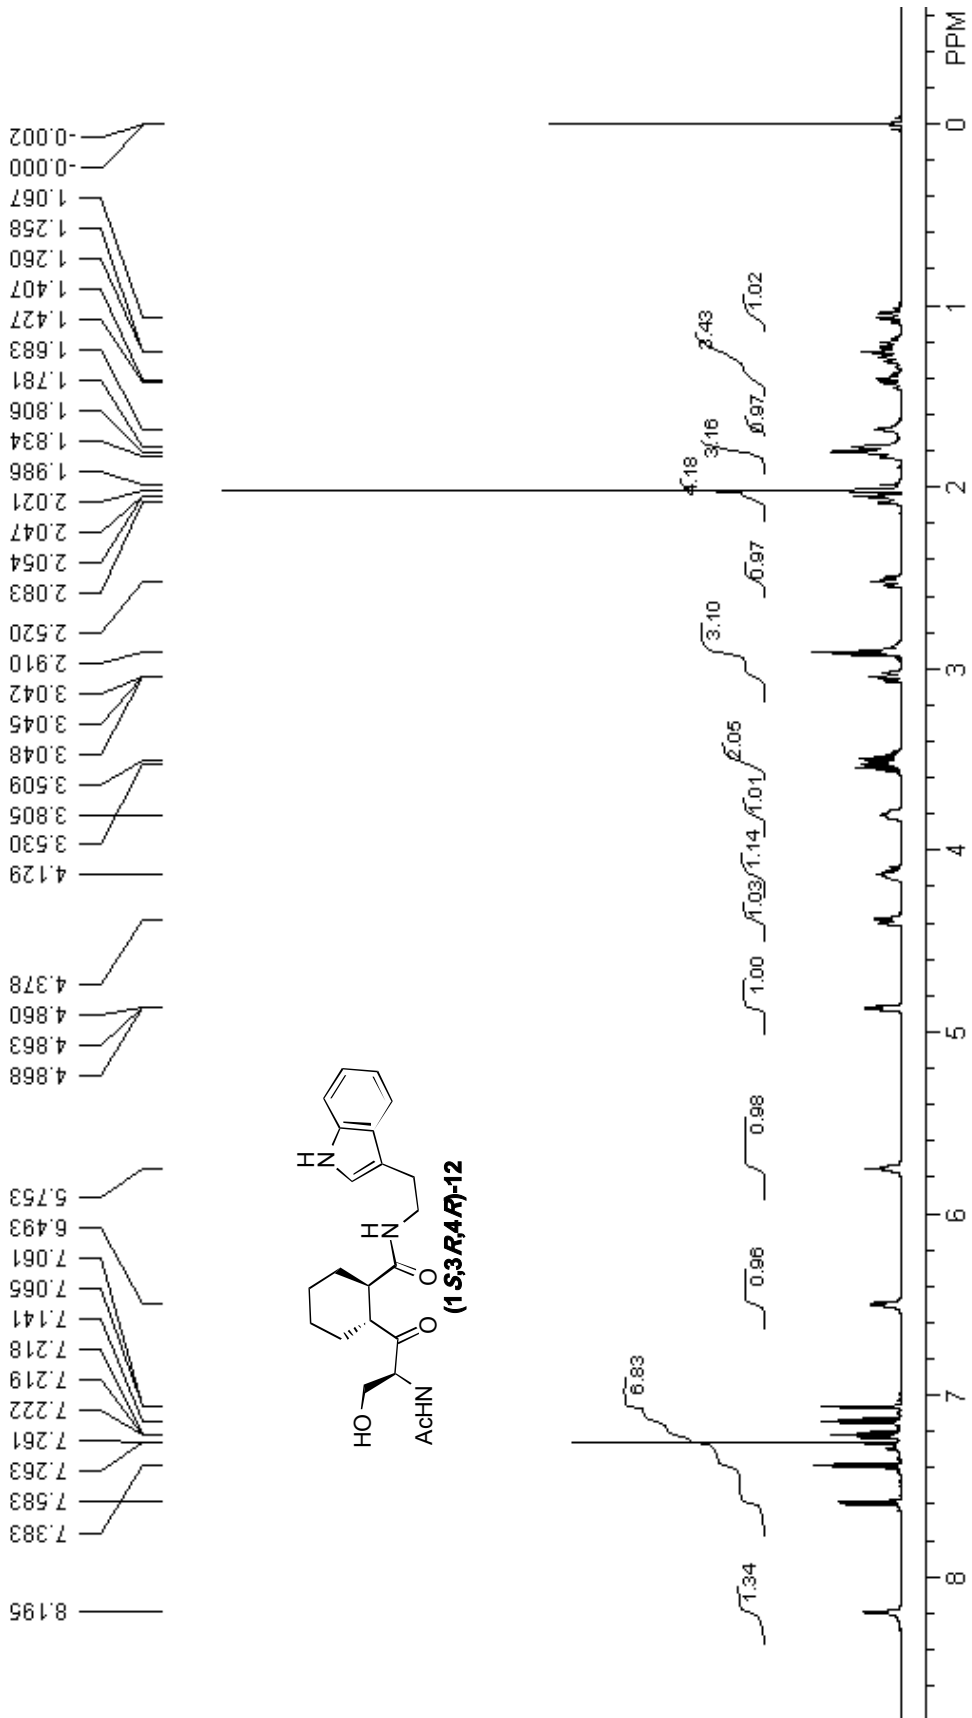

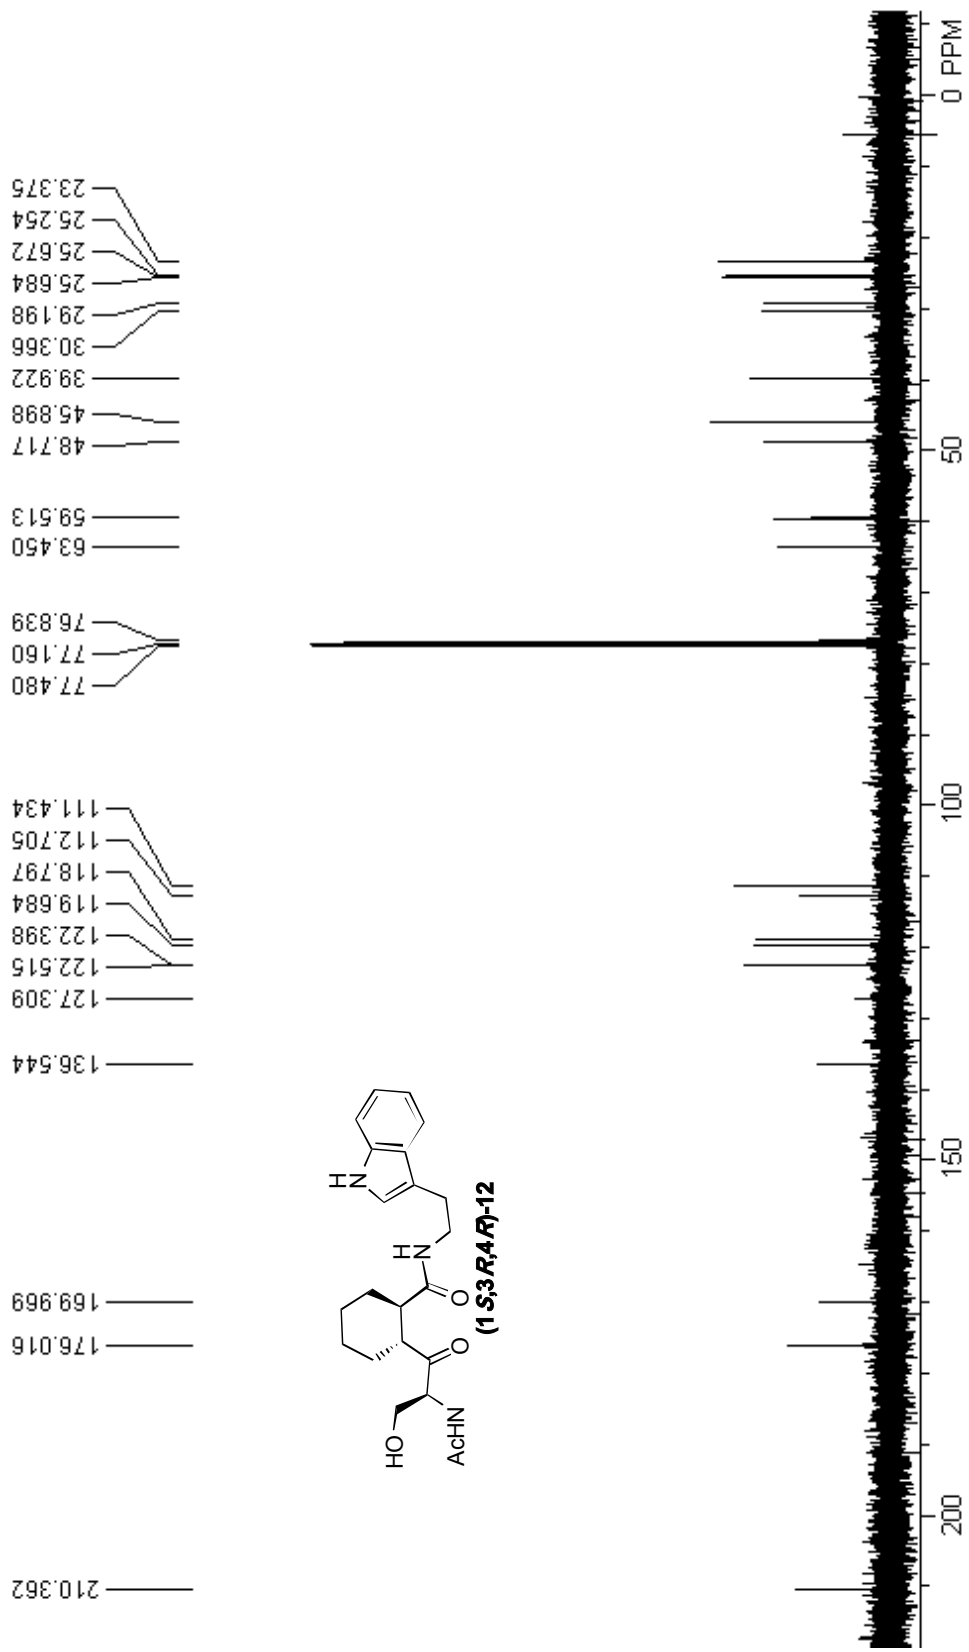



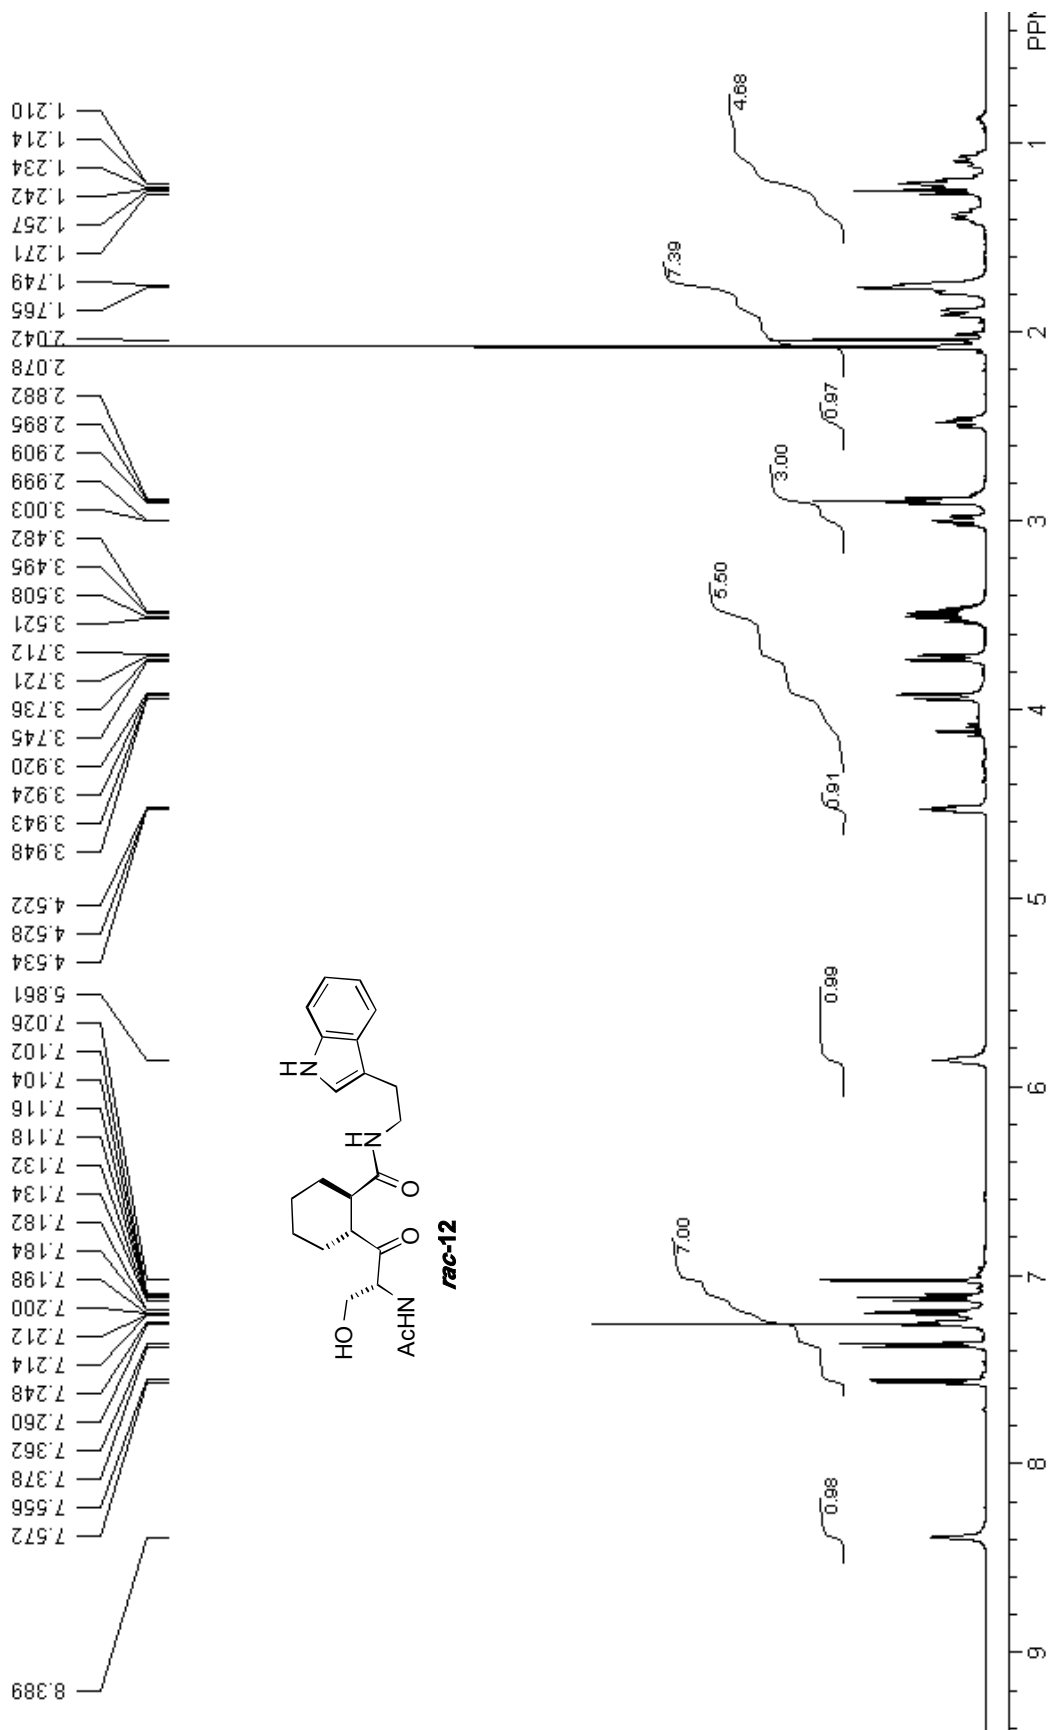

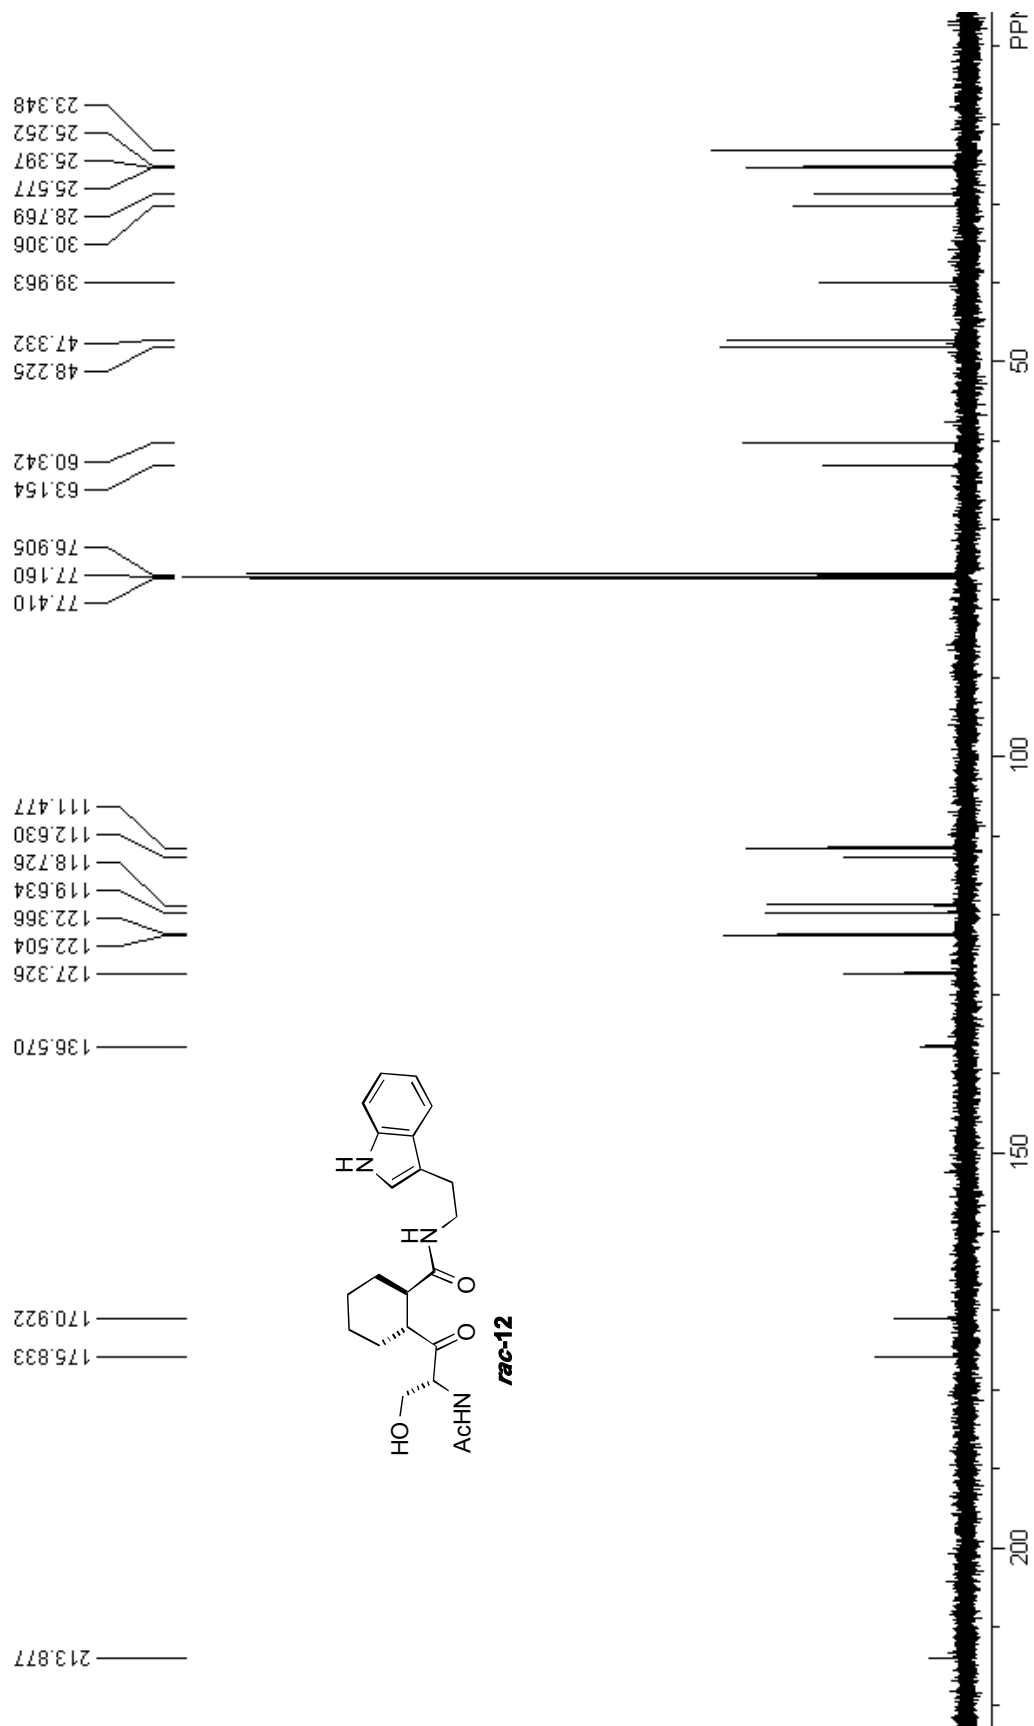

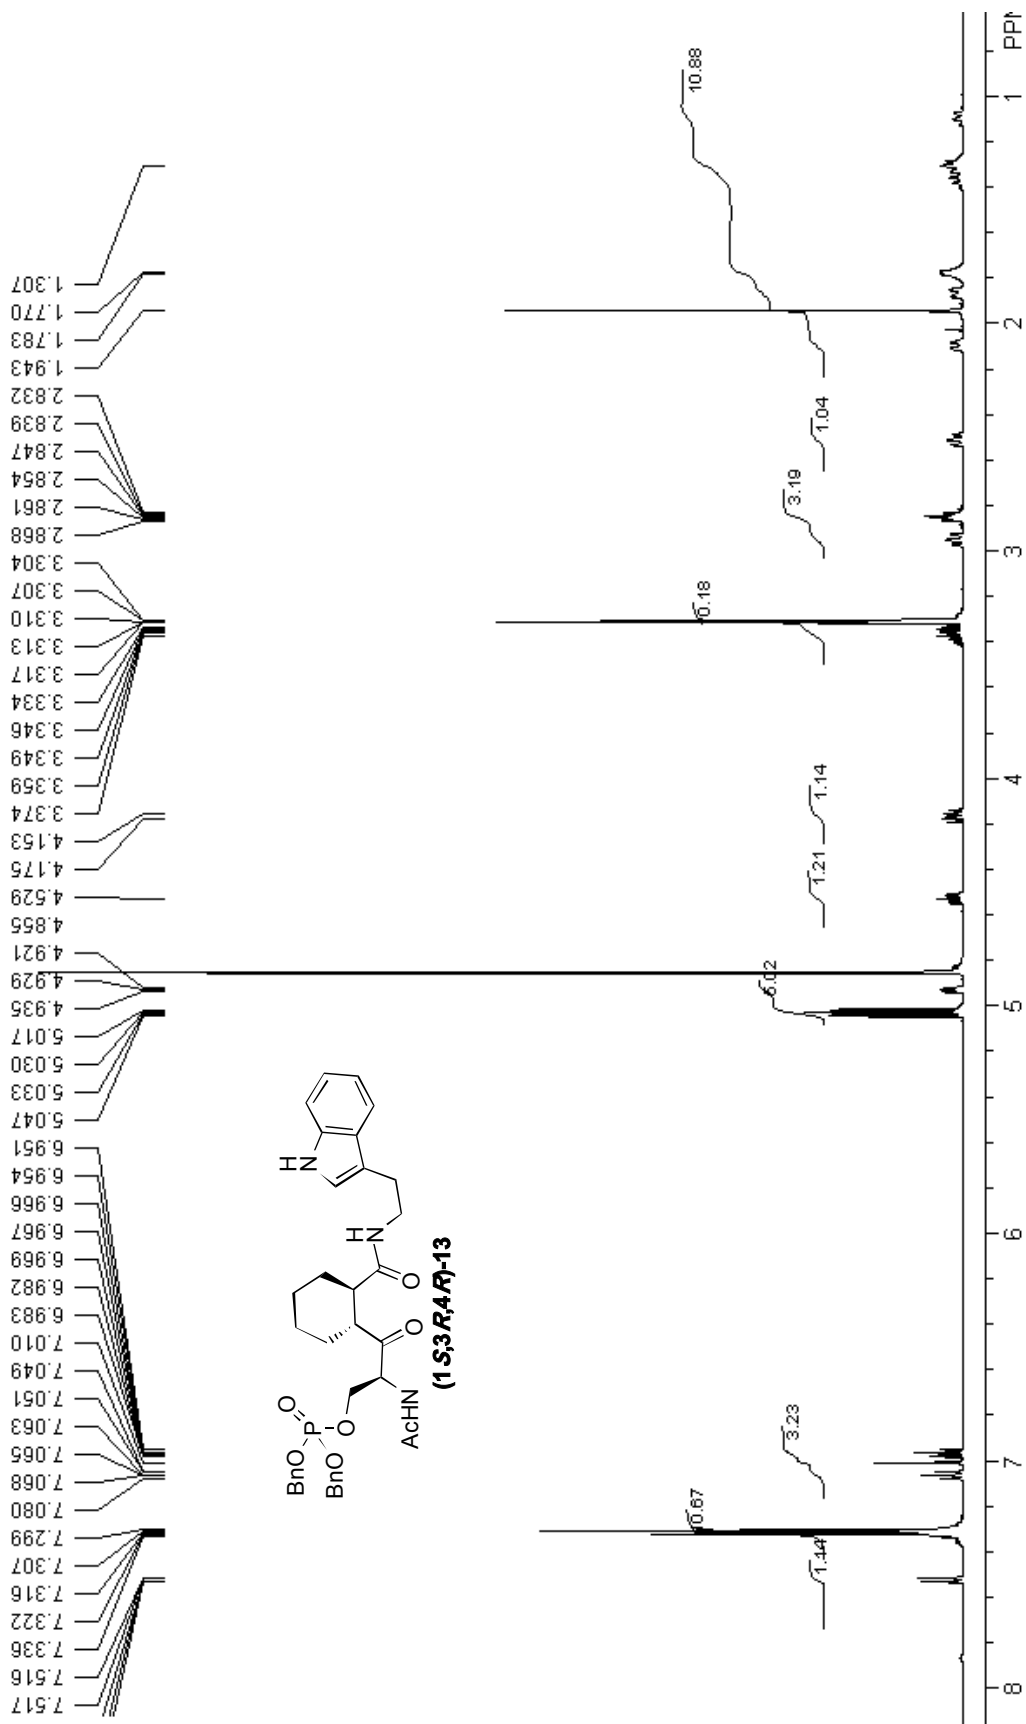

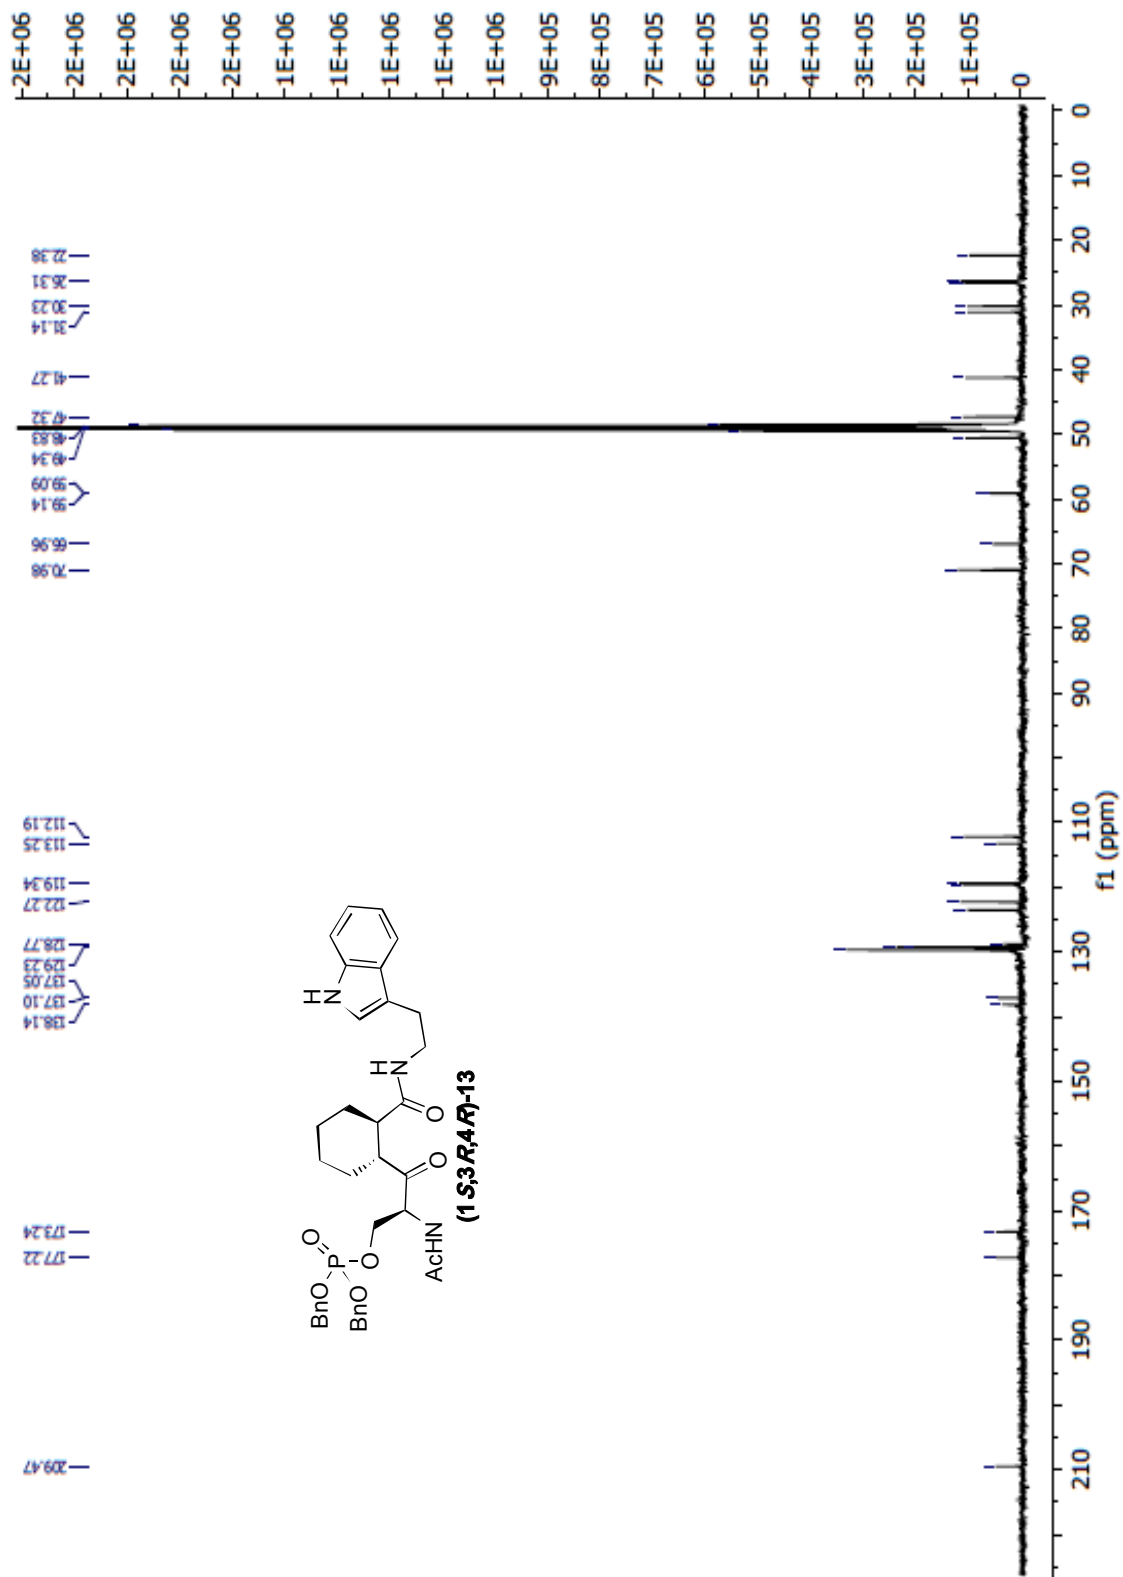

$^{31}\text{P}$ -NMR

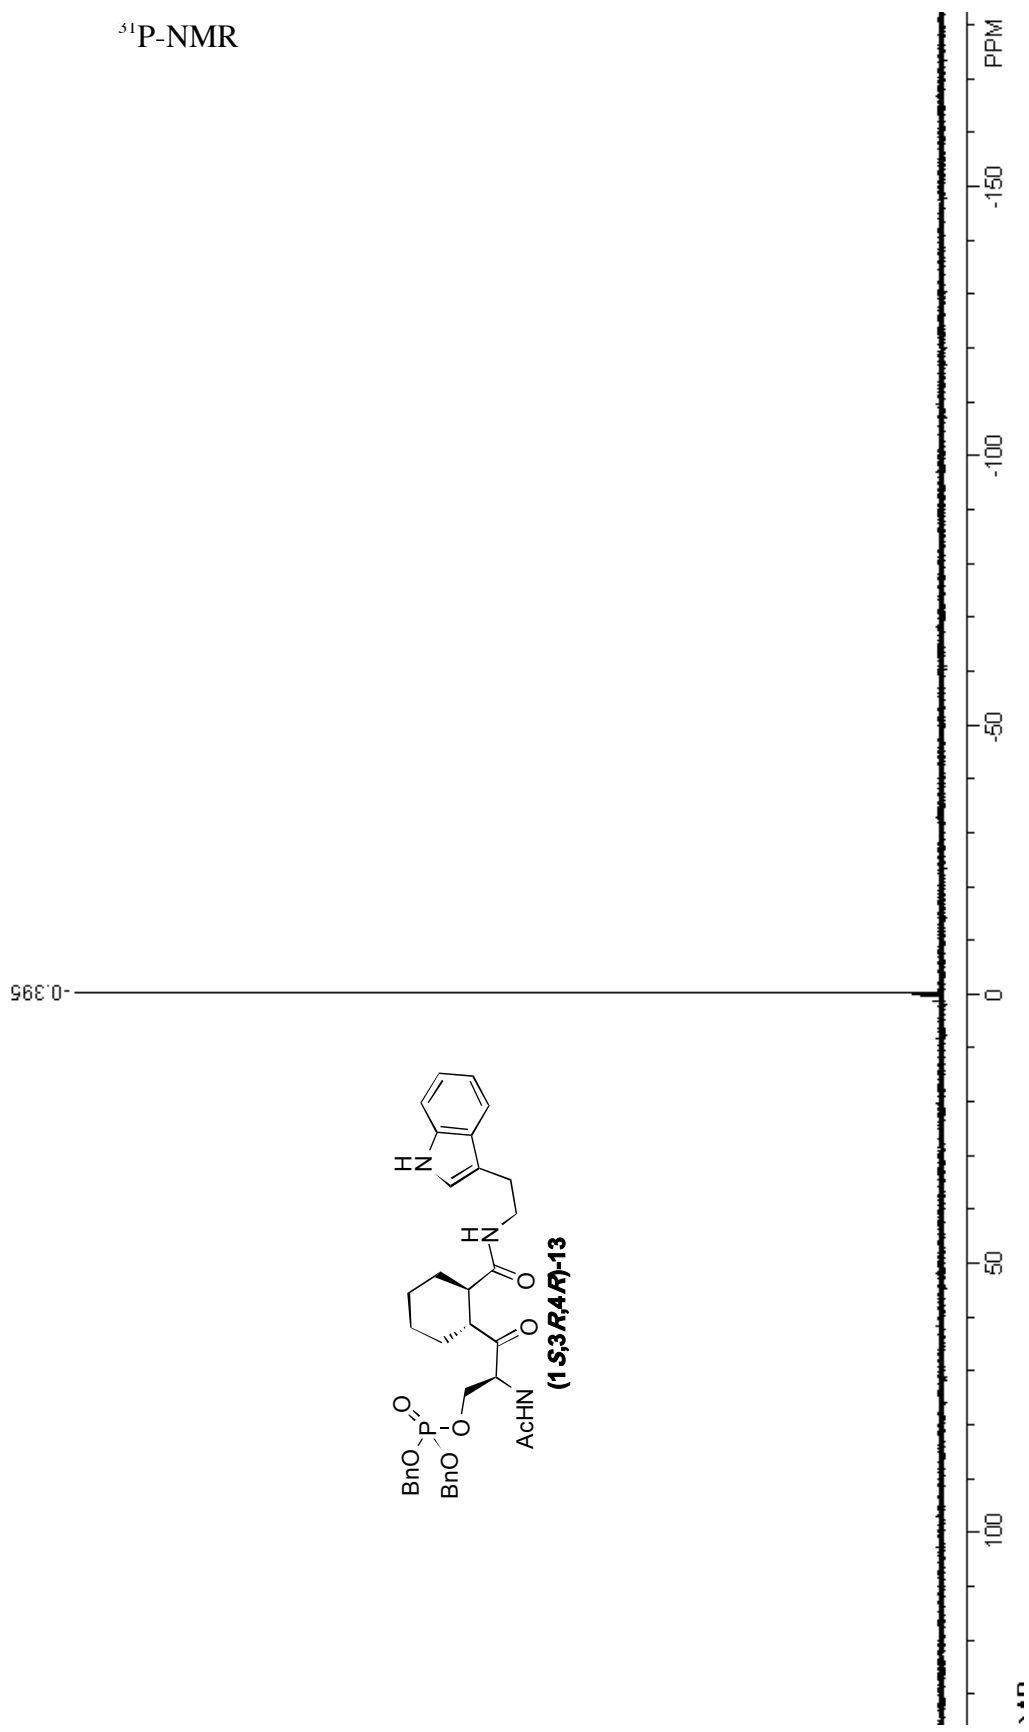

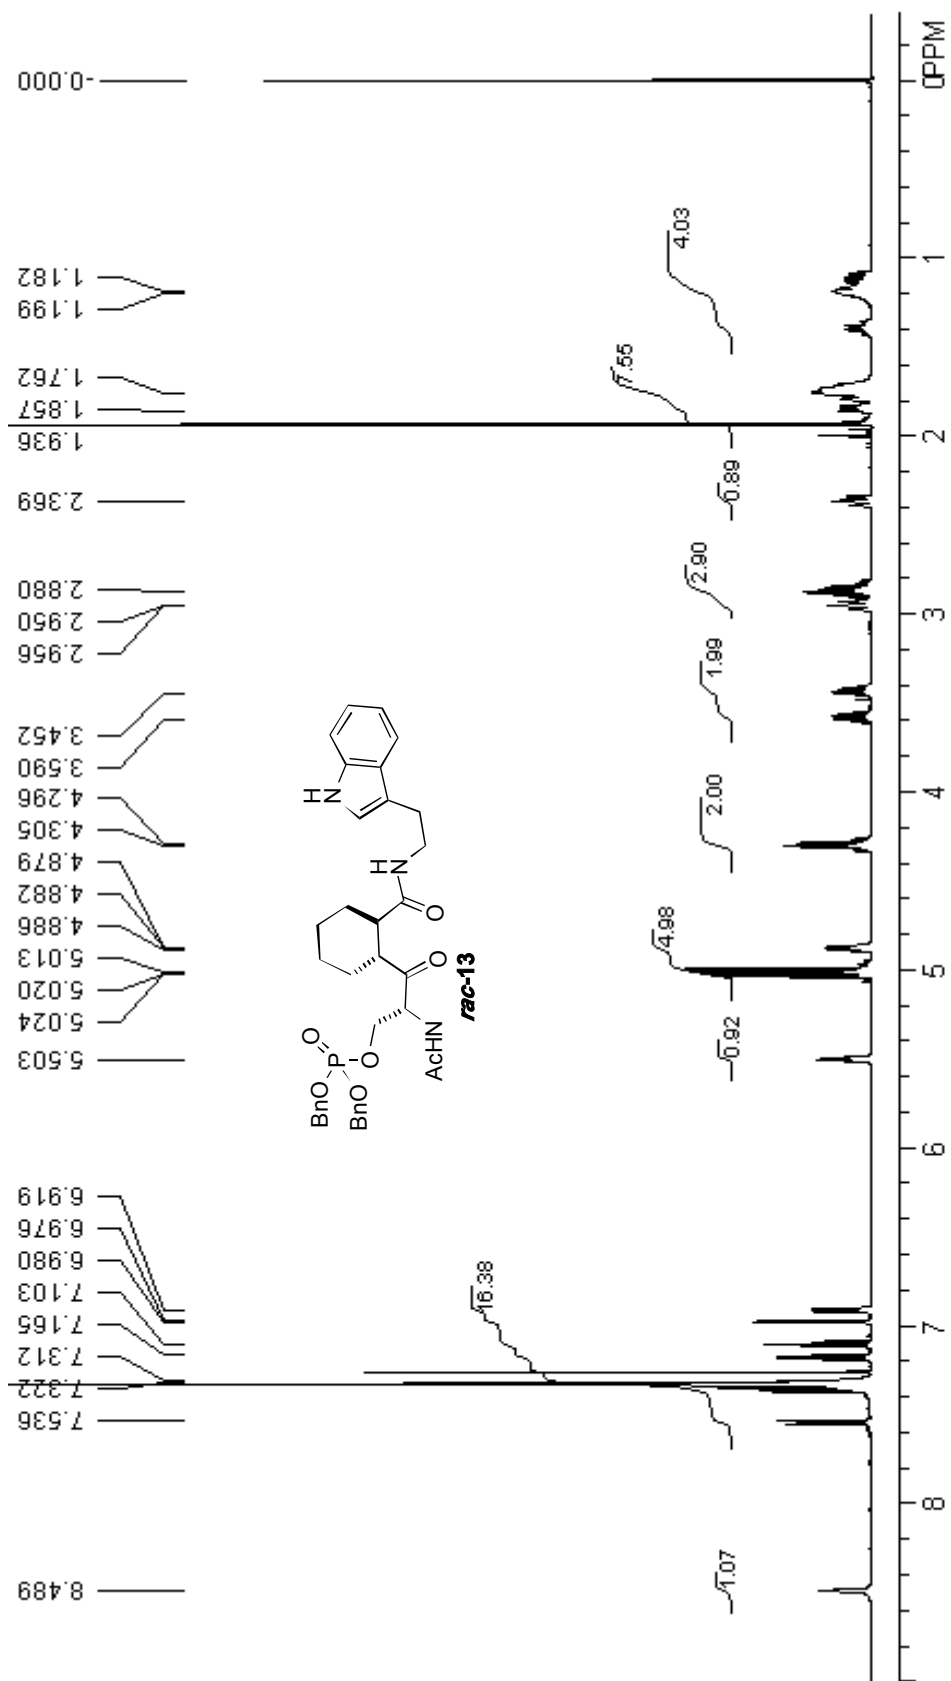

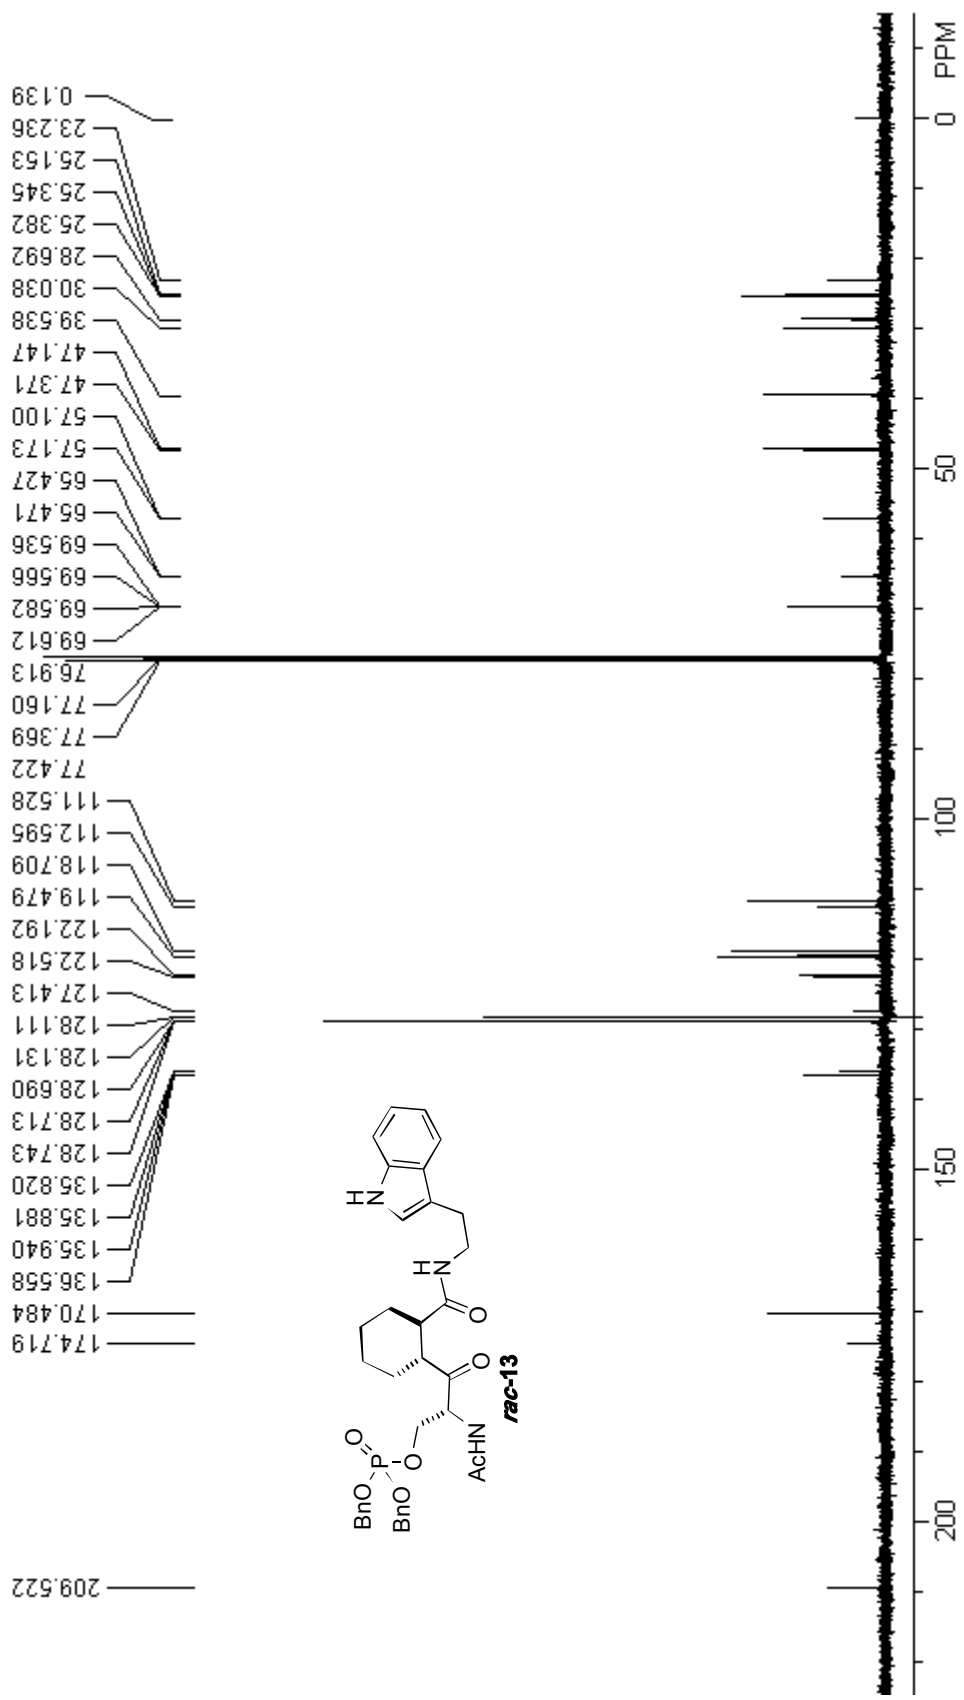

$^{31}\text{P}$ -NMR

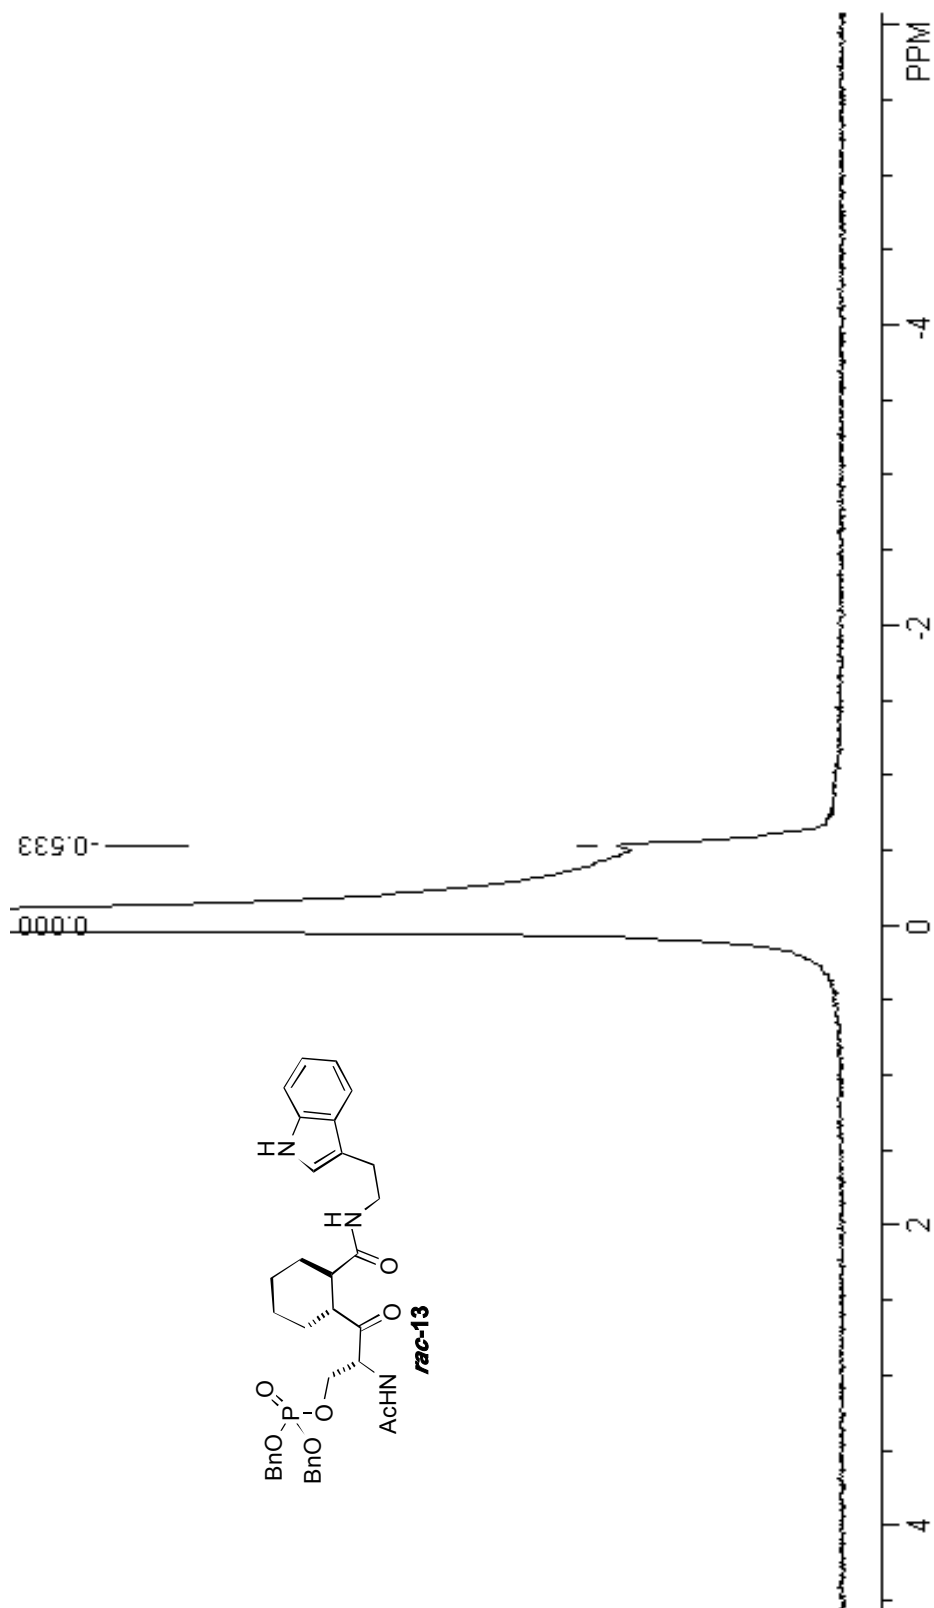



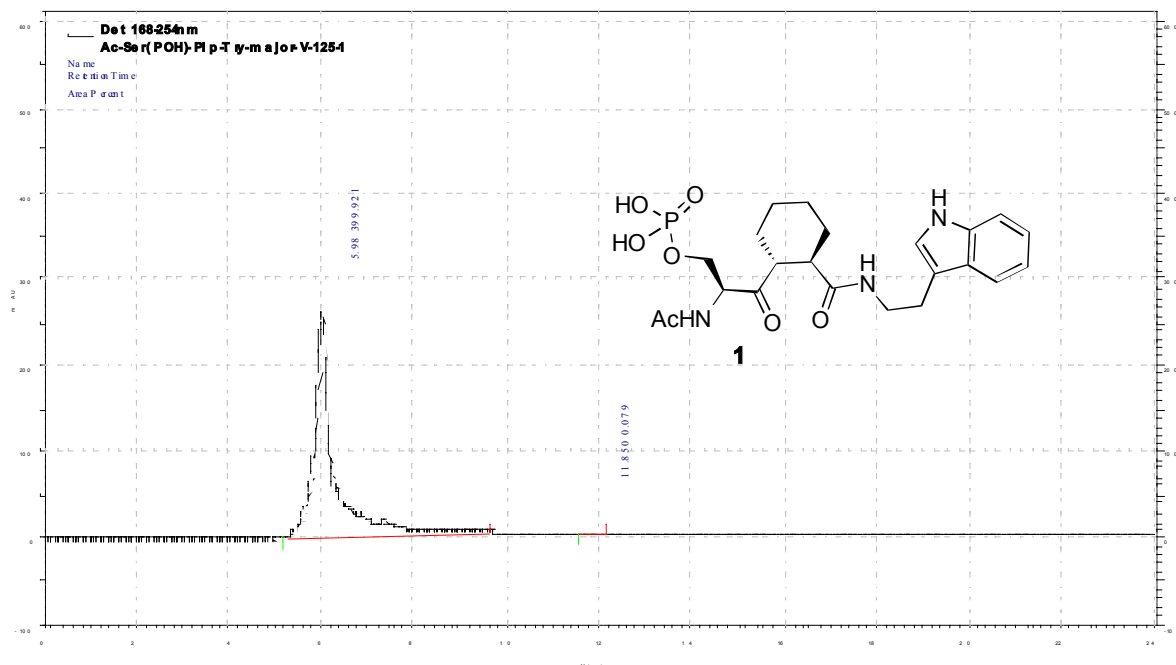

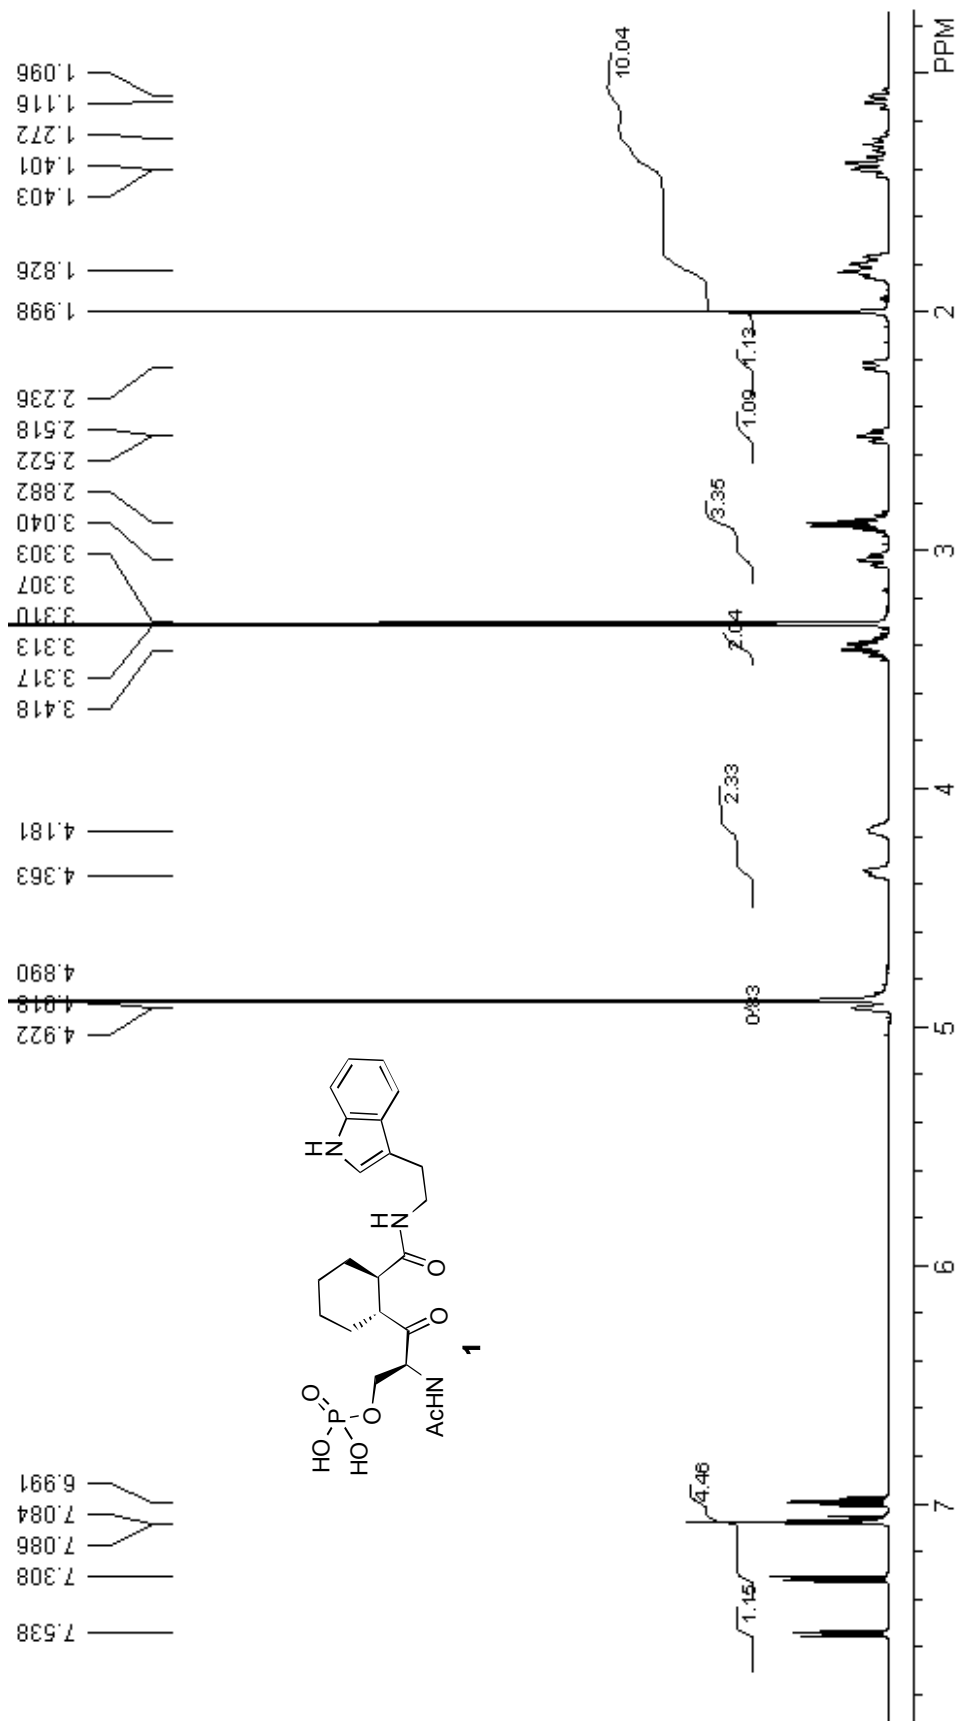

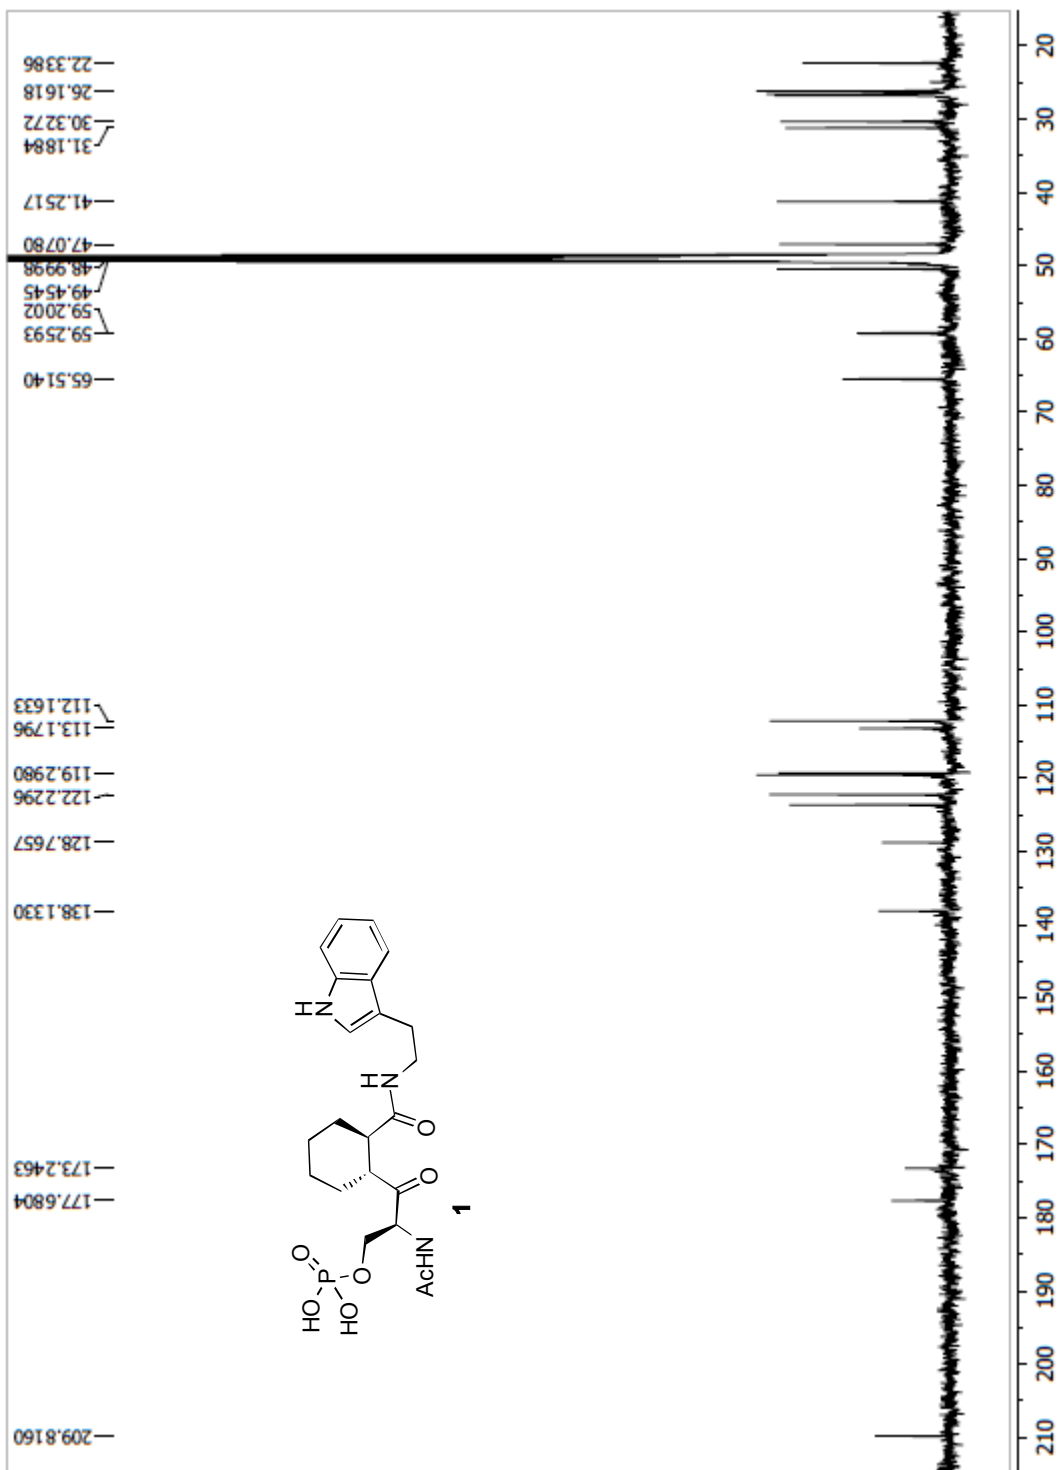

$^{31}\text{P}$ -NMR

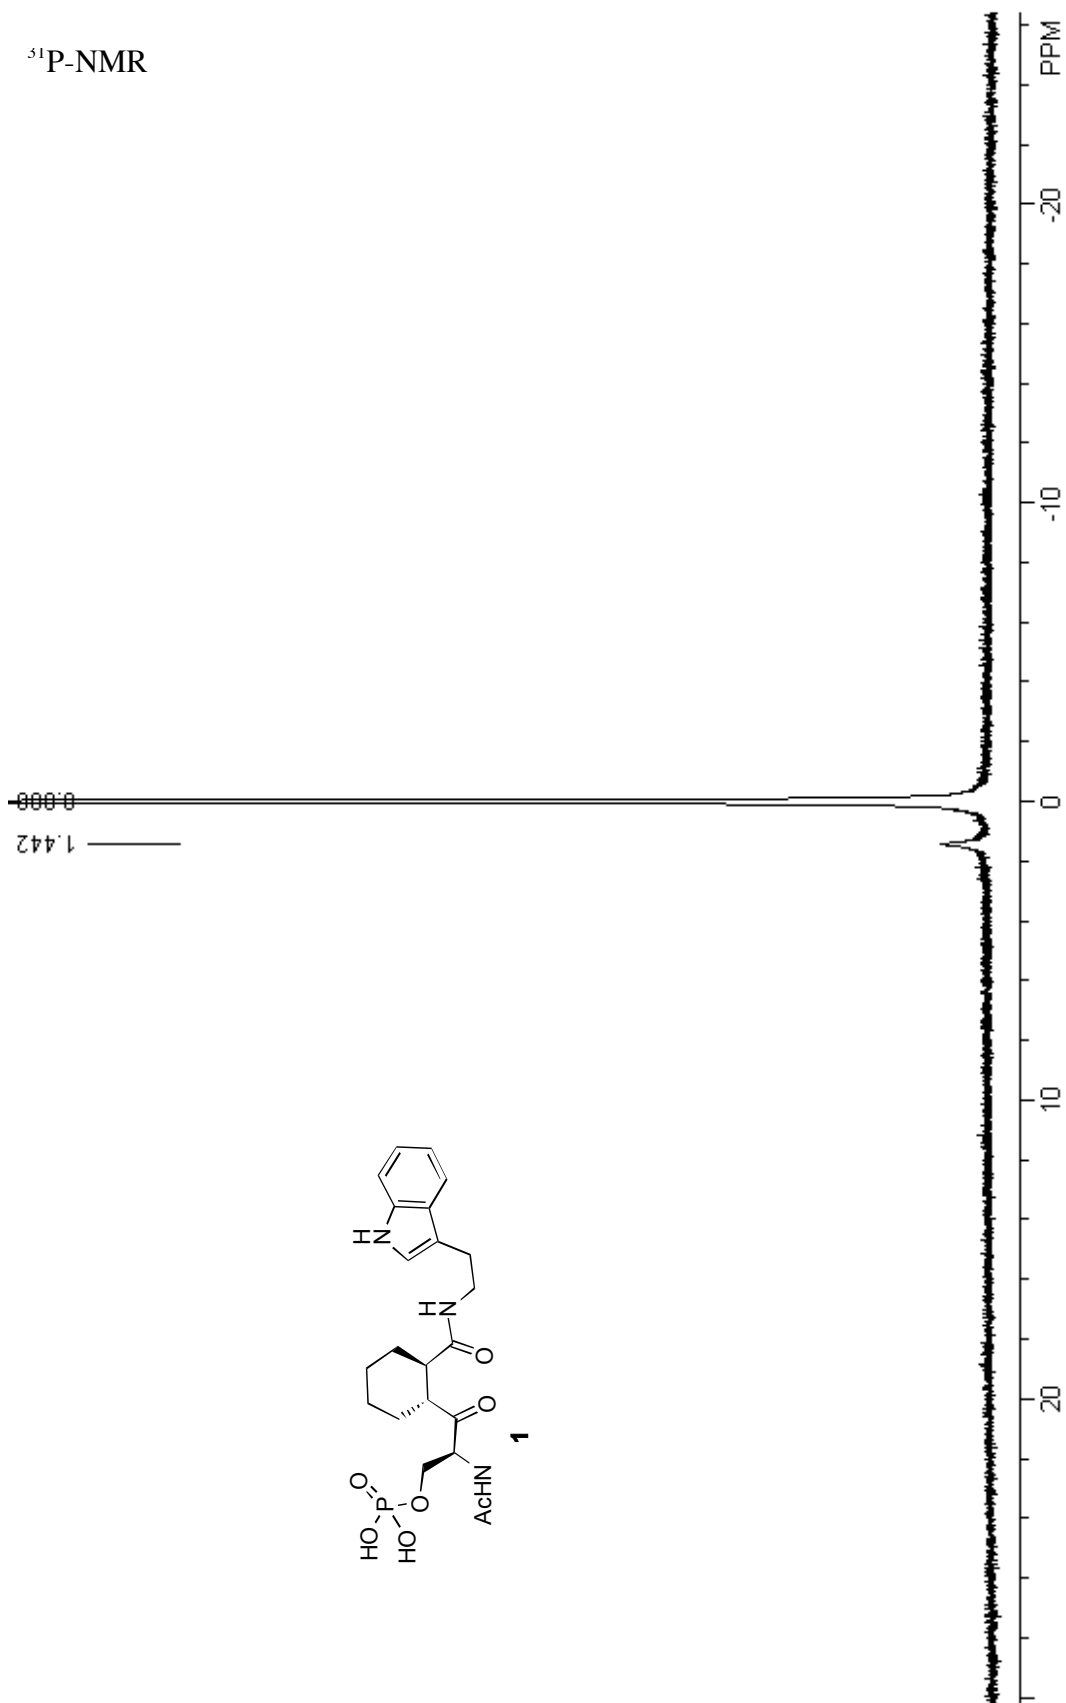

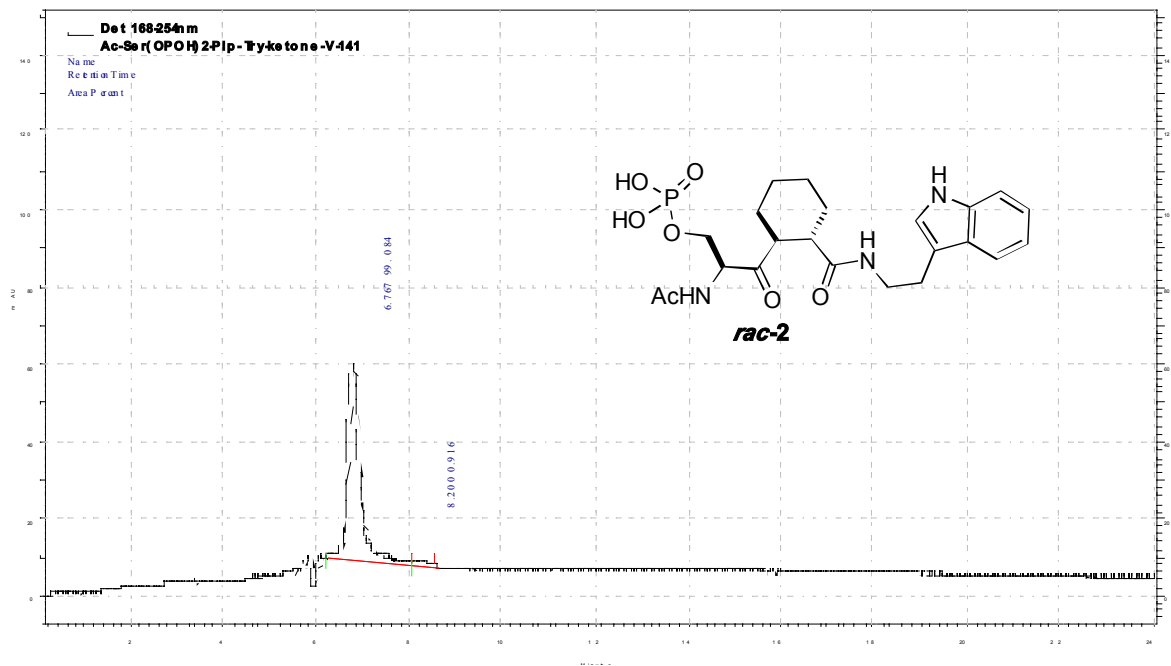

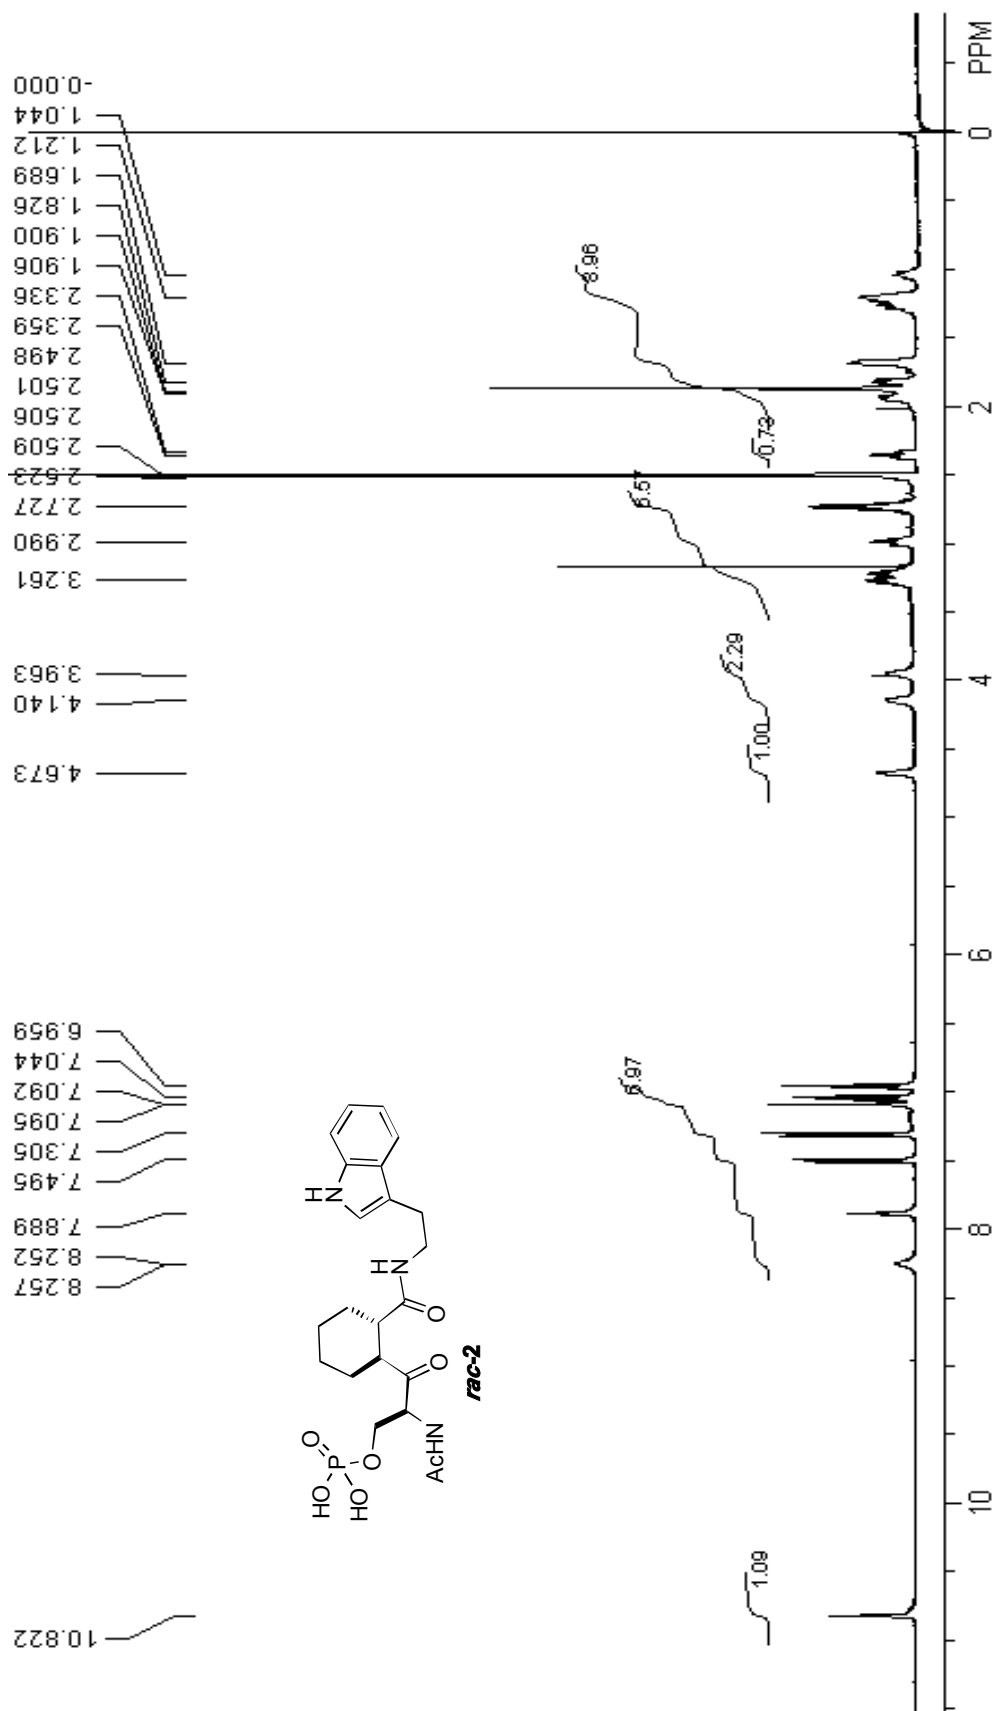

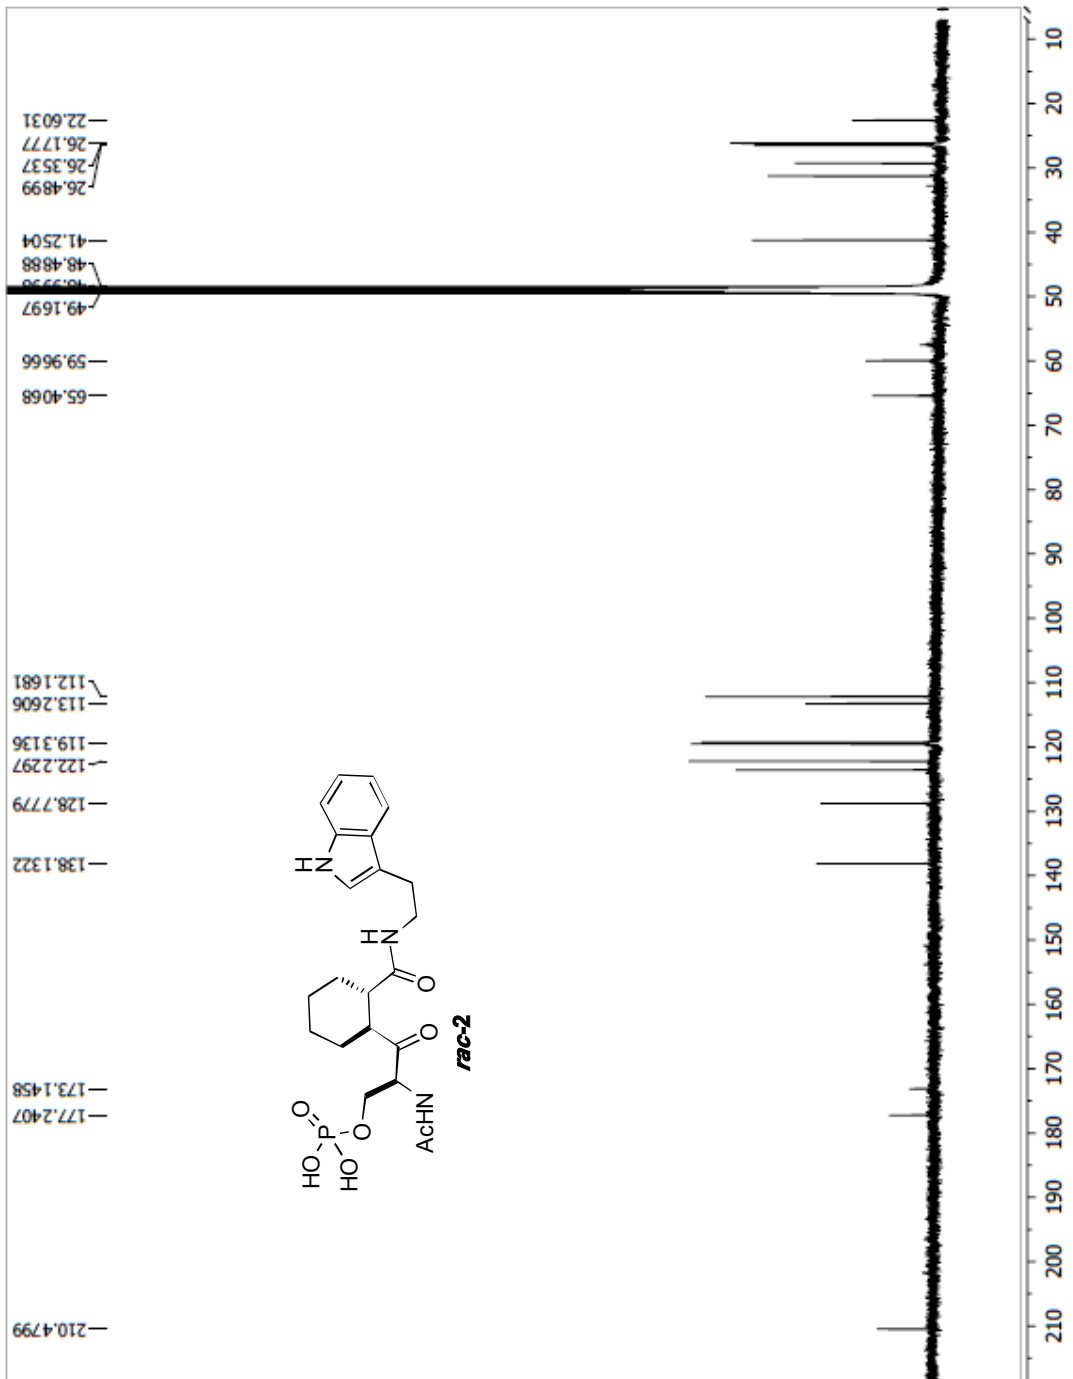

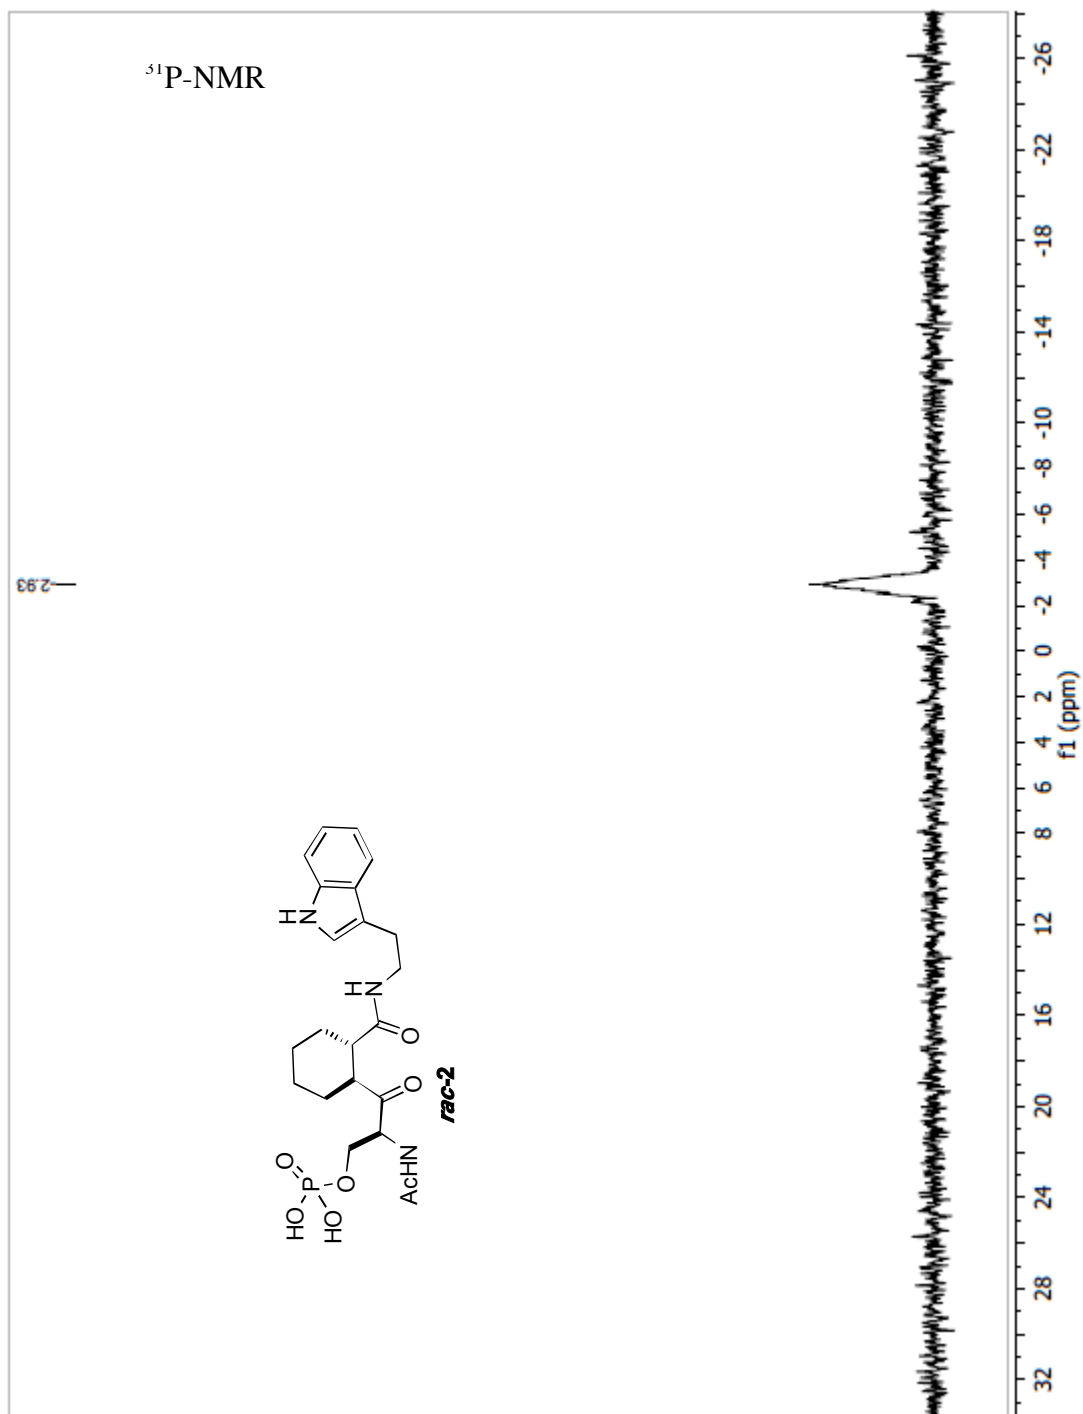

Supplement: pone.0044226.s001.pdf [file pone.0044226.s001.pdf]
