# Supplementary material for: Cyclohexyl Ketone Inhibitors of Pin1 Dock in a Trans-Diaxial Cyclohexane Conformation
Source: PubMed Central journal article supplement (PMC3446931; doi:10.1371/journal.pone.0044226), 2012-09-19
Supplement: pone.0044226.s002.pdf [file pone.0044226.s002.pdf]

Supporting Information

## Cyclohexyl ketone inhibitors of Pin1 dock in a *trans*-diaxial cyclohexane conformation

Guoyan G. Xu, Carla Slebodnick, and Felicia A. Etzkorn\*

Department of Chemistry, Virginia Tech, Blacksburg, VA 24061-0212, USA

**Dataset S2.** Pin1 inhibition plots and curve fits for compounds **1** and *rac*-**2**.

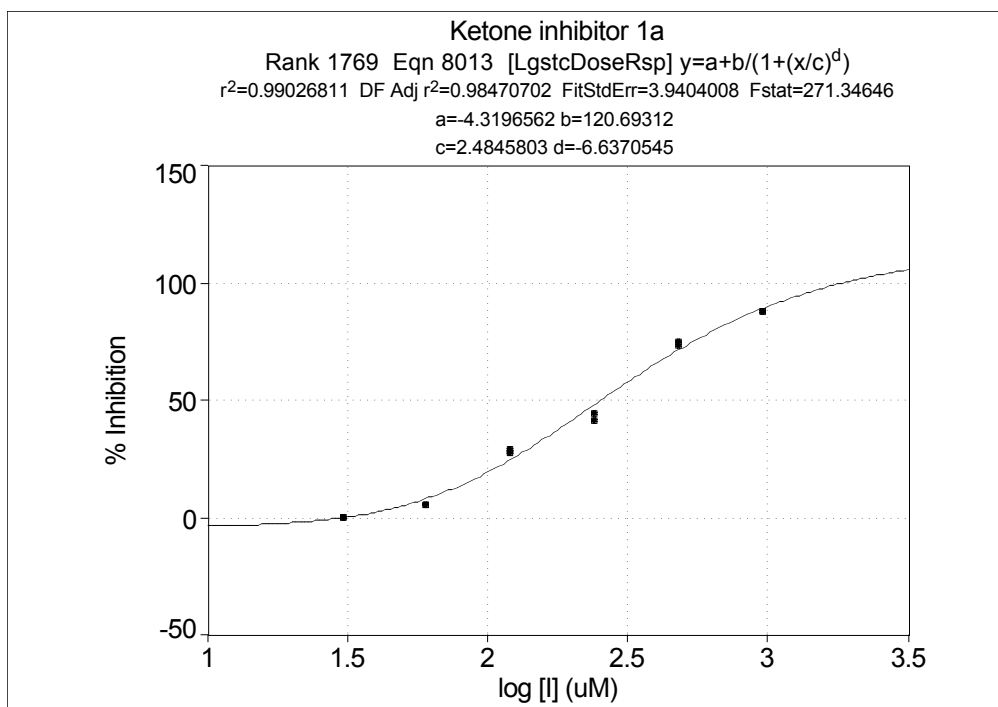

Dose response curve for inhibition of Pin1 by compound **1**.  $IC_{50} = 260 \pm 30 \mu M$

---

\* Corresponding author. Phone: +1 540 231 2235; fax: +1 540 231 3255; e-mail: [fetzkorn@vt.edu](mailto:fetzkorn@vt.edu)

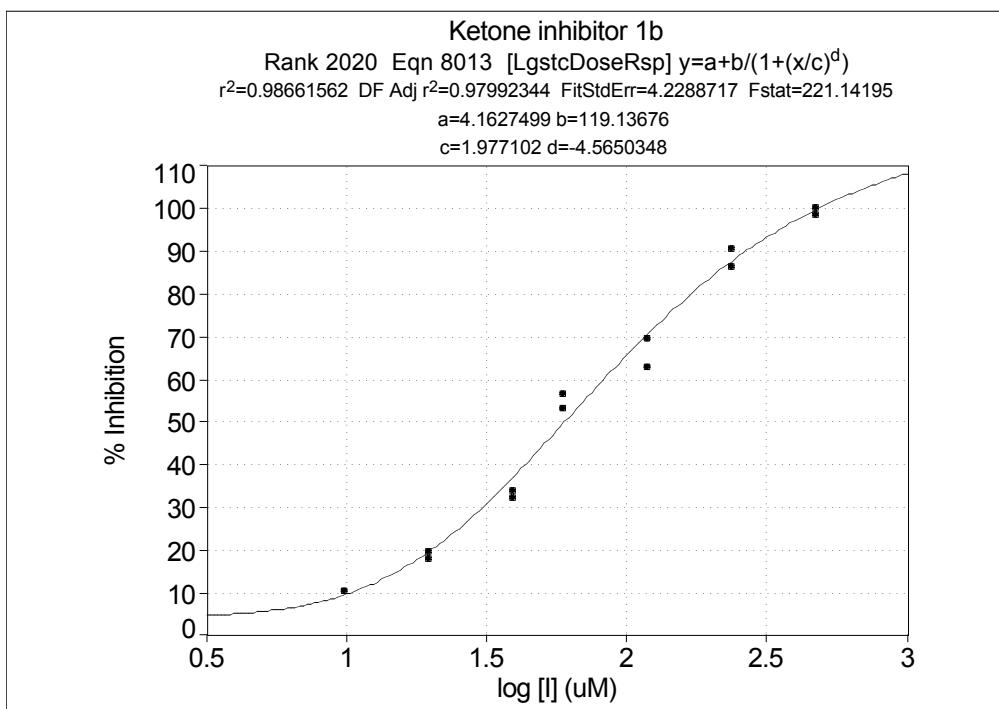

Dose response curve for inhibition of Pin1 by compound *rac-2*.  $IC_{50} = 60 \pm 8 \mu M$ .
